# Supplementary material for: Good for some, bad for others: US investors and non-trade issues in preferential trade agreements
Source: Springer Nature journal article supplement (doi:10.1007/s11558-018-9299-2), 2018-02-21
Supplement: MOESM1 [file 15482202]

Appendix:  
“Good for some, bad for others:  
US investors and non-trade issues in preferential trade  
agreements”

Lisa Lechner  
Department of Political Science  
University of Salzburg  
[lisa.lechner@sbg.ac.at](mailto:lisa.lechner@sbg.ac.at)

# Contents

|                                                                                  |    |
|----------------------------------------------------------------------------------|----|
| List of Countries                                                                | 5  |
| Baseline Model                                                                   | 9  |
| Anticipation Effect                                                              | 10 |
| Robustness Checks                                                                | 10 |
| a. Placebo Test                                                                  | 11 |
| b. Lagged Dependent Variable                                                     | 12 |
| c. Subsample: Only Countries Signing a PTA with US                               | 14 |
| d. Alternative Estimation Strategies                                             | 16 |
| e. Reduced Model                                                                 | 20 |
| f. Expanded Model                                                                | 22 |
| f. Time-Variant Interaction (H2): Energy Consumption instead of Pollution Levels | 24 |
| Sector-Names' Matching Table Sectors                                             | 27 |

**Note on the Codebook:** I coded the following data-points twice in every PTA. Additionally and to ensure reliability, I cross-checked some data points against existing data-sets that cover similar variables (Kohl et al., 2016; Morin et al., 2016; Raess and Sari, 2016; Spilker and Böhmelt, 2012). Further, I conducted automated text analysis (keyword-match on regular expressions).

### Labor Rights: Coding-scheme and factor loadings

| Dimension  | Variable Name                                       | Definition                                                             | Factor Loading |
|------------|-----------------------------------------------------|------------------------------------------------------------------------|----------------|
| Obligation | lr_main_except                                      | prohibition of trade and investment on the expense of labor rights     | 0              |
| Obligation | lr_main_promotion <sup>1</sup>                      | promotion of labor rights                                              | 0.053          |
| Obligation | lr_main_obl                                         | obligation to comply with labor rights                                 | 0.102          |
| Obligation | lr_obl_measure                                      | concrete measures to improve labor rights                              | 0.185          |
| Obligation | conditionality_post_lr                              | potential monetary sanctions in case of labor rights violation         | 0.843          |
| Obligation | conditionality_pre_lr                               | market access is conditional upon labor rights compliance              | 5.036          |
| Delegation | delegation_lr_implementation_domestic_norm_dom      | decisions on disputes on labor rights must be implemented domestically | 0.185          |
| Delegation | body_lr                                             | establishment of a body dealing with labor rights                      | 0.338          |
| Delegation | delegation_lr_dispute_resol_conciliation            | conciliation over disputes on labor rights                             | 0.338          |
| Delegation | delegation_lr_access_consult_io <sup>2</sup>        | consulting international organizations for labor rights issues         | 0.338          |
| Delegation | delegation_lr_access_file_individual                | individuals are allowed to file disputes on labor rights issues        | 0.554          |
| Delegation | delegation_lr_dispute_resol_adhoc_panel             | establishment of ad-hoc panels in case of disputes on labor rights     | 0.688          |
| Delegation | delegation_lr_access_consult_public                 | consulting public for labor rights issues                              | 0.688          |
| Delegation | assessment_lr_body                                  | assessment is delegated to international body                          | 0.742          |
| Delegation | delegation_lr_access_consult_business               | consulting business for labor rights issues                            | 0.843          |
| Delegation | delegation_lr_access_consult_union                  | consulting trade unions for labor rights issues                        | 0.843          |
| Delegation | delegation_lr_dispute_resol_state_veto              | disputes on labor rights are resolved by member states                 | 1.015          |
| Delegation | delegation_lr_access_consult_experts                | consulting experts for labor rights issues                             | 1.227          |
| Delegation | delegation_lr_implementation_international_decision | decisions on disputes are implemented by international tribunals       | 1.227          |
| Delegation | delegation_lr_access_consult_NGO                    | consulting NGOs for labor rights issues                                | 1.227          |
| Delegation | delegation_lr_access_consult_science                | consulting academia for labor rights issues                            | 5.036          |
| Delegation | delegation_lr_access_file_State                     | member states file disputes on labor rights                            | 5.036          |
| Precision  | lr_general                                          | general clause on labor rights                                         | 0.462          |
| Precision  | lr_specific                                         | specific definition on labor rights                                    | 1.227          |
| Precision  | lr_specific_multiple <sup>3</sup>                   | multiple specific issue areas on labor rights (15 coding points)       | 5.036          |

<sup>1</sup>I use 2 data-points to capture this aspect: labor rights that appear in the preambel, labor rights that appear in the main text, but are written in a promotional rather than binding manner.

<sup>2</sup>This aspect consists of several data-points that capture the varying IOs: ILO, ILO follow up, ILO children's rights, American Charter of Social Guarantees, UN, UNESR, and European Social Charter.

<sup>3</sup>This aspect consists of 15 data-points: right to work, right to social security, protection of migrant-workers, right to equal opportunity at work, health and safety at work, prohibition of forced labor, prohibition of child labor, minimum wage, right to unionize, right to bargain collectively, regulated working time (e.g. right to leasure), right to (vocational) training.

<sup>4</sup>I use 2 data-points to capture this aspect: environmental protection issues that appear in the preambel, environmental protection issues that appear in the main text, but are written in a promotional rather than binding manner.

<sup>5</sup>The aspect consists of 38 data-points that capture varying environmental IOs.

<sup>6</sup>This aspect consists of 11 data-points: clean air, emission reduction, prohibition of hazardeous waste, prohibition of hazardeous chemicals, prohibition of contaminating substances, forest protection, sustainable fishing, sustainable mineral extraction, reduction of water pollution, protection of wildlife, protection of biodiversity.

## Environmental Protection: Coding-scheme and factor loadings

| names      | ps                                                  |                                                                                    |        |
|------------|-----------------------------------------------------|------------------------------------------------------------------------------------|--------|
| Obligation | ep_obl_promotion <sup>4</sup>                       | promotion of environmental protection                                              | 0      |
| Obligation | ep_obl_measure                                      | concrete measure to improve environmental protection                               | 0.526  |
| Obligation | ep_main_exept                                       | prohibition of trade and investment on the expense of environmental protection     | 0.526  |
| Obligation | ep_obl                                              | obligation to comply with environmental protection                                 | 0.582  |
| Obligation | conditionality_post_ep                              | potential monetary sanctions in case of labor rights violation                     | 2.641  |
| Obligation | conditionality_pre_ep                               | market access is conditional upon labor rights compliance                          | 13.374 |
| Delegation | delegation_ep_implementation_domestic_norm_dom      | decision on disputes on environmental protection must be implemented domestically  | 0.526  |
| Delegation | body_ep                                             | establishment of a body dealing with environmental protection                      | 0.923  |
| Delegation | delegation_ep_access_consult_public                 | consulting the public for environmental protection issues                          | 0.923  |
| Delegation | delegation_ep_access_file_Individual                | individuals can file disputes on the grounds of environmental protection violation | 0.923  |
| Delegation | delegation_ep_dispute_resol_conciliation            | conciliation over disputes on environmental protection issues                      | 0.923  |
| Delegation | delegation_ep_access_consult_ngo                    | consulting NGOs for environmental protection issues                                | 1.657  |
| Delegation | delegation_EP_dispute_resol_adhoc_panel             | establishment of ad-hoc panels in case of disputes on environmental protection     | 1.834  |
| Delegation | assessment_EP_body                                  | assessment is delegated to international body                                      | 1.998  |
| Delegation | delegation_ep_access_consult_io                     | consulting the IOs for environmental protection issues <sup>5</sup>                | 1.998  |
| Delegation | delegation_EP_access_consult_business               | consulting business for environmental protection issues                            | 1.998  |
| Delegation | delegation_EP_access_consult_experts                | consulting experts for environmental protection issues                             | 2.641  |
| Delegation | delegation_EP_access_file_State                     | member states file disputes on environmental protection issues                     | 2.641  |
| Delegation | delegation_ep_access_consult_science                | consulting academia for environmental protection issues                            | 3.455  |
| Delegation | delegation_ep_dispute_resol_state_veto              | disputes on environmental protection are resolved by member states                 | 3.455  |
| Delegation | delegation_ep_implementation_international_decision | decision on disputes are implemented by international tribunals                    | 13.374 |
| Precision  | ep_general                                          | general clause on labor rights                                                     | 0.470  |
| Precision  | ep_specific                                         | specific definition on labor rights                                                | 3.081  |
| Precision  | ep_specific_multiple <sup>6</sup>                   | multiple specific issue areas on labor rights (15 coding points)                   | 13.374 |

**Note on List of Countries:** Bahrain, El-Salvador Guatemala, Jordan<sup>7</sup>, Morocco, and Vietnam are US-PTA partner states, but BEA misses information on sectoral FDI from US firms after the entry into force of the PTA. For this reason, I cover 13 US-PTA partner states in my analysis.

### List of Countries

|                       | Country                         | Measurement period |
|-----------------------|---------------------------------|--------------------|
| US-treaty partner     | Australia                       | 1982 - 2015        |
| US-treaty partner     | Bahrain                         | 1989 - 1999        |
| US-treaty partner     | Canada                          | 1982 - 2015        |
| US-treaty partner     | Chile                           | 1982 - 2015        |
| US-treaty partner     | Colombia                        | 1982 - 2015        |
| US-treaty partner     | Costa Rica                      | 1982 - 2015        |
| US-treaty partner     | Dominican Republic              | 1982 - 2015        |
| US-treaty partner     | El Salvador                     | 1989 - 1999        |
| US-treaty partner     | Honduras                        | 1982 - 2015        |
| US-treaty partner     | Israel                          | 1982 - 2015        |
| US-treaty partner     | Guatemala                       | 1982 - 1999        |
| US-treaty partner     | Jordan                          | 1989 - 1999        |
| US-treaty partner     | Korea, Republic of              | 1982 - 2015        |
| US-treaty partner     | Mexico                          | 1982 - 2015        |
| US-treaty partner     | Morocco                         | 1989 - 1999        |
| US-treaty partner     | Nicaragua                       | 1989 - 1999        |
| US-treaty partner     | Panama                          | 1982 - 2015        |
| US-treaty partner     | Peru                            | 1982 - 2015        |
| US-treaty partner     | Singapore                       | 1982 - 2015        |
| Non-US-treaty partner | Albania                         | 1994 - 1999        |
| Non-US-treaty partner | Algeria                         | 1989 - 1999        |
| Non-US-treaty partner | Andorra                         | 1999 - 1999        |
| Non-US-treaty partner | Angola                          | 1989 - 1999        |
| Non-US-treaty partner | Antigua and Barbuda             | 1989 - 1999        |
| Non-US-treaty partner | Azerbaijan                      | 1992 - 1999        |
| Non-US-treaty partner | Argentina                       | 1982 - 2015        |
| Non-US-treaty partner | Austria                         | 1982 - 2015        |
| Non-US-treaty partner | Bahamas                         | 1982 - 1999        |
| Non-US-treaty partner | Bangladesh                      | 1989 - 1999        |
| Non-US-treaty partner | Armenia                         | 1999 - 1999        |
| Non-US-treaty partner | Barbados                        | 1982 - 2015        |
| Non-US-treaty partner | Belgium                         | 1982 - 2015        |
| Non-US-treaty partner | Bermuda                         | 1982 - 2015        |
| Non-US-treaty partner | Bhutan                          | 1999 - 1999        |
| Non-US-treaty partner | Bolivia, Plurinational State of | 1989 - 1999        |
| Non-US-treaty partner | Bosnia and Herzegovina          | 1994 - 1999        |
| Non-US-treaty partner | Botswana                        | 1989 - 1999        |
| Non-US-treaty partner | Brazil                          | 1982 - 2015        |
| Non-US-treaty partner | Belize                          | 1989 - 1999        |
| Non-US-treaty partner | Solomon Islands                 | 1994 - 1999        |
| Non-US-treaty partner | Brunei Darussalam               | 1989 - 1999        |
| Non-US-treaty partner | Bulgaria                        | 1994 - 1999        |
| Non-US-treaty partner | Myanmar                         | 1989 - 1999        |
| Non-US-treaty partner | Belarus                         | 1998 - 1999        |
| Non-US-treaty partner | Cambodia                        | 1998 - 1999        |
| Non-US-treaty partner | Cameroon                        | 1989 - 1999        |

<sup>7</sup>The Jordan-US PTA was signed in 2000. Therefore, I am able to include Jordan in the analysis on the anticipation effect.

## List of Countries

|                       | Country                                | Measurement period |
|-----------------------|----------------------------------------|--------------------|
| Non-US-treaty partner | Central African Republic               | 1999 - 1999        |
| Non-US-treaty partner | Sri Lanka                              | 1989 - 1999        |
| Non-US-treaty partner | Chad                                   | 1989 - 1999        |
| Non-US-treaty partner | China                                  | 1982 - 2015        |
| Non-US-treaty partner | Taiwan, Province of China              | 1982 - 2015        |
| Non-US-treaty partner | Congo                                  | 1989 - 1999        |
| Non-US-treaty partner | Congo, the Democratic Republic of the  | 1989 - 1999        |
| Non-US-treaty partner | Croatia                                | 1992 - 1999        |
| Non-US-treaty partner | Cuba                                   | 1989 - 1999        |
| Non-US-treaty partner | Cyprus                                 | 1989 - 1999        |
| Non-US-treaty partner | Czechoslovakia                         | 1990 - 1992        |
| Non-US-treaty partner | Czech Republic                         | 1993 - 2015        |
| Non-US-treaty partner | Denmark                                | 1982 - 2015        |
| Non-US-treaty partner | Dominica                               | 1989 - 1999        |
| Non-US-treaty partner | Ecuador                                | 1982 - 2015        |
| Non-US-treaty partner | Equatorial Guinea                      | 1992 - 1999        |
| Non-US-treaty partner | Ethiopia                               | 1989 - 1999        |
| Non-US-treaty partner | Eritrea                                | 1997 - 1999        |
| Non-US-treaty partner | Estonia                                | 1994 - 1999        |
| Non-US-treaty partner | Fiji                                   | 1989 - 1999        |
| Non-US-treaty partner | Finland                                | 1982 - 2015        |
| Non-US-treaty partner | France                                 | 1982 - 2015        |
| Non-US-treaty partner | French Guiana                          | 1989 - 1999        |
| Non-US-treaty partner | Djibouti                               | 1989 - 1999        |
| Non-US-treaty partner | Gabon                                  | 1989 - 1999        |
| Non-US-treaty partner | Georgia                                | 1999 - 1999        |
| Non-US-treaty partner | Germany                                | 1982 - 2015        |
| Non-US-treaty partner | Ghana                                  | 1989 - 1999        |
| Non-US-treaty partner | Gibraltar                              | 1989 - 1999        |
| Non-US-treaty partner | Greece                                 | 1982 - 2015        |
| Non-US-treaty partner | Greenland                              | 1989 - 1999        |
| Non-US-treaty partner | Grenada                                | 1989 - 1999        |
| Non-US-treaty partner | Guinea                                 | 1989 - 1999        |
| Non-US-treaty partner | Guyana                                 | 1989 - 1999        |
| Non-US-treaty partner | Haiti                                  | 1989 - 1999        |
| Non-US-treaty partner | Hong Kong                              | 1982 - 2015        |
| Non-US-treaty partner | Hungary                                | 1989 - 2015        |
| Non-US-treaty partner | Iceland                                | 1989 - 1999        |
| Non-US-treaty partner | India                                  | 1982 - 2015        |
| Non-US-treaty partner | Indonesia                              | 1982 - 2015        |
| Non-US-treaty partner | Iran, Islamic Republic of              | 1989 - 1999        |
| Non-US-treaty partner | Ireland                                | 1982 - 2015        |
| Non-US-treaty partner | Italy                                  | 1982 - 2015        |
| Non-US-treaty partner | Cote d'Ivoire                          | 1989 - 1999        |
| Non-US-treaty partner | Jamaica                                | 1982 - 1999        |
| Non-US-treaty partner | Japan                                  | 1982 - 2015        |
| Non-US-treaty partner | Kazakhstan                             | 1992 - 1999        |
| Non-US-treaty partner | Kenya                                  | 1989 - 1999        |
| Non-US-treaty partner | Korea, Democratic People's Republic of | 1990 - 1992        |
| Non-US-treaty partner | Kuwait                                 | 1989 - 1999        |
| Non-US-treaty partner | Kyrgyzstan                             | 1999 - 1999        |
| Non-US-treaty partner | Lao People's Democratic Republic       | 1994 - 1999        |
| Non-US-treaty partner | Lebanon                                | 1989 - 1999        |
| Non-US-treaty partner | Lesotho                                | 1989 - 1999        |
| Non-US-treaty partner | Latvia                                 | 1994 - 1999        |
| Non-US-treaty partner | Liberia                                | 1989 - 1999        |
| Non-US-treaty partner | Libya                                  | 1989 - 1999        |
| Non-US-treaty partner | Liechtenstein                          | 1989 - 1999        |
| Non-US-treaty partner | Lithuania                              | 1994 - 1999        |
| Non-US-treaty partner | Luxembourg                             | 1982 - 2015        |

## List of Countries

|                       | Country                          | Measurement period |
|-----------------------|----------------------------------|--------------------|
| Non-US-treaty partner | Macao                            | 1989 - 1999        |
| Non-US-treaty partner | Madagascar                       | 1989 - 1999        |
| Non-US-treaty partner | Malawi                           | 1989 - 1999        |
| Non-US-treaty partner | Malaysia                         | 1982 - 2015        |
| Non-US-treaty partner | Mali                             | 1989 - 1999        |
| Non-US-treaty partner | Malta                            | 1989 - 1999        |
| Non-US-treaty partner | Mauritania                       | 1989 - 1999        |
| Non-US-treaty partner | Mauritius                        | 1989 - 1999        |
| Non-US-treaty partner | Moldova, Republic of             | 1999 - 1999        |
| Non-US-treaty partner | Morocco                          | 1989 - 1999        |
| Non-US-treaty partner | Mozambique                       | 1994 - 1999        |
| Non-US-treaty partner | Oman                             | 1989 - 1999        |
| Non-US-treaty partner | Namibia                          | 1994 - 1999        |
| Non-US-treaty partner | Nauru                            | 1999 - 1999        |
| Non-US-treaty partner | Nepal                            | 1999 - 1999        |
| Non-US-treaty partner | Netherlands                      | 1982 - 2015        |
| Non-US-treaty partner | Netherlands Antilles             | 1982 - 1999        |
| Non-US-treaty partner | Aruba                            | 1989 - 1999        |
| Non-US-treaty partner | Vanuatu                          | 1989 - 1999        |
| Non-US-treaty partner | New Zealand                      | 1982 - 2015        |
| Non-US-treaty partner | Nicaragua                        | 1989 - 1999        |
| Non-US-treaty partner | Niger                            | 1989 - 1999        |
| Non-US-treaty partner | Nigeria                          | 1982 - 2015        |
| Non-US-treaty partner | Norway                           | 1982 - 2015        |
| Non-US-treaty partner | Micronesia, Federated States of  | 1989 - 1999        |
| Non-US-treaty partner | Marshall Islands                 | 1989 - 1999        |
| Non-US-treaty partner | Palau                            | 1989 - 1999        |
| Non-US-treaty partner | Pakistan                         | 1989 - 1999        |
| Non-US-treaty partner | Papua New Guinea                 | 1989 - 1999        |
| Non-US-treaty partner | Paraguay                         | 1989 - 1999        |
| Non-US-treaty partner | Philippines                      | 1982 - 2015        |
| Non-US-treaty partner | Poland                           | 1990 - 2015        |
| Non-US-treaty partner | Portugal                         | 1982 - 2015        |
| Non-US-treaty partner | Qatar                            | 1989 - 1999        |
| Non-US-treaty partner | Romania                          | 1989 - 1999        |
| Non-US-treaty partner | Russian Federation               | 1989 - 2015        |
| Non-US-treaty partner | Rwanda                           | 1989 - 1993        |
| Non-US-treaty partner | Saint Kitts and Nevis            | 1989 - 1999        |
| Non-US-treaty partner | Anguilla                         | 1999 - 1999        |
| Non-US-treaty partner | Saint Lucia                      | 1989 - 1999        |
| Non-US-treaty partner | Saint Vincent and the Grenadines | 1989 - 1999        |
| Non-US-treaty partner | Saudi Arabia                     | 1982 - 2015        |
| Non-US-treaty partner | Senegal                          | 1989 - 1999        |
| Non-US-treaty partner | Serbia                           | 1992 - 1999        |
| Non-US-treaty partner | Seychelles                       | 1999 - 1999        |
| Non-US-treaty partner | Sierra Leone                     | 1989 - 1999        |
| Non-US-treaty partner | Slovakia                         | 1993 - 1999        |
| Non-US-treaty partner | Viet Nam                         | 1994 - 1999        |
| Non-US-treaty partner | Slovenia                         | 1992 - 1999        |
| Non-US-treaty partner | Somalia                          | 1989 - 1999        |
| Non-US-treaty partner | South Africa                     | 1982 - 2015        |
| Non-US-treaty partner | Zimbabwe                         | 1989 - 1999        |
| Non-US-treaty partner | Yemen People's Republic          | 1989 - 1989        |
| Non-US-treaty partner | Spain                            | 1982 - 2015        |
| Non-US-treaty partner | Sudan                            | 1989 - 1999        |
| Non-US-treaty partner | Suriname                         | 1989 - 1999        |
| Non-US-treaty partner | Swaziland                        | 1989 - 1999        |
| Non-US-treaty partner | Sweden                           | 1982 - 2015        |
| Non-US-treaty partner | Switzerland                      | 1982 - 2015        |
| Non-US-treaty partner | Syrian Arab Republic             | 1989 - 1999        |

## List of Countries

|                       | Country                                    | Measurement period |
|-----------------------|--------------------------------------------|--------------------|
| Non-US-treaty partner | Thailand                                   | 1982 - 2015        |
| Non-US-treaty partner | Togo                                       | 1989 - 1999        |
| Non-US-treaty partner | Tonga                                      | 1989 - 1999        |
| Non-US-treaty partner | Trinidad and Tobago                        | 1982 - 1999        |
| Non-US-treaty partner | United Arab Emirates                       | 1982 - 2015        |
| Non-US-treaty partner | Tunisia                                    | 1989 - 1999        |
| Non-US-treaty partner | Turkey                                     | 1982 - 2015        |
| Non-US-treaty partner | Turkmenistan                               | 1994 - 1999        |
| Non-US-treaty partner | Uganda                                     | 1989 - 1999        |
| Non-US-treaty partner | Ukraine                                    | 1994 - 1999        |
| Non-US-treaty partner | Macedonia, the former Yugoslav Republic of | 1999 - 1999        |
| Non-US-treaty partner | Egypt                                      | 1982 - 2015        |
| Non-US-treaty partner | United Kingdom                             | 1982 - 2015        |
| Non-US-treaty partner | Tanzania, United Republic of               | 1989 - 1999        |
| Non-US-treaty partner | Burkina Faso                               | 1989 - 1999        |
| Non-US-treaty partner | Uruguay                                    | 1989 - 1999        |
| Non-US-treaty partner | Uzbekistan                                 | 1993 - 1999        |
| Non-US-treaty partner | Venezuela, Bolivarian Republic of          | 1982 - 2015        |
| Non-US-treaty partner | Samoa                                      | 1989 - 1999        |
| Non-US-treaty partner | Yemen                                      | 1989 - 1999        |
| Non-US-treaty partner | Zambia                                     | 1989 - 1999        |



# Baseline Models

Table 2: Baseline (H1)

| <i>Dependent variable:</i> |                                  |
|----------------------------|----------------------------------|
| EP in PTA                  | 0.354***<br>(0.121)              |
| Pollution Levels           | 646,114.000*<br>(337,826.400)    |
| Economic Depth of PTA      | -0.008<br>(0.095)                |
| Residual of 1st stage      | -0.030<br>(0.044)                |
| EP in PTA:Pollution Levels | -0.154***<br>(0.013)             |
| Constant                   | -1,201,505.000*<br>(628,216.200) |
| Year-fixed effects?        | Yes                              |
| Country-fixed effects?     | Yes                              |
| Observations               | 39,955                           |
| R <sup>2</sup>             | 0.442                            |
| Adjusted R <sup>2</sup>    | 0.438                            |
| Residual Std. Error        | 4.440 (df = 39720)               |
| F Statistic                | 134.186*** (df = 234; 39720)     |

*Note:* \*p<0.1; \*\*p<0.05; \*\*\*p<0.01

Table 3: Baseline (H2)

|                           | <i>Dependent variable:</i>  |                             |
|---------------------------|-----------------------------|-----------------------------|
|                           | FDI (low-wage)<br>(1)       | FDI (high-wage)<br>(2)      |
| Labor Rights in PTA       | 0.714***<br>(0.158)         | -1.065***<br>(0.159)        |
| Labor Endowment           | 4.838***<br>(1.677)         | -4.815***<br>(1.866)        |
| Economic Depth of PTA     |                             | 2.060***<br>(0.335)         |
| Residual of 1st stage     | 0.033<br>(0.082)            | 0.129<br>(0.080)            |
| Labor Rights:Labor Endow. | -2.228***<br>(0.343)        | 3.524***<br>(0.495)         |
| Constant                  | -3.424***<br>(0.821)        | 2.267**<br>(0.988)          |
| Year-fixed effects?       | Yes                         | Yes                         |
| Country-fixed effects?    | Yes                         | Yes                         |
| Observations              | 19,389                      | 21,534                      |
| R <sup>2</sup>            | 0.469                       | 0.419                       |
| Adjusted R <sup>2</sup>   | 0.463                       | 0.413                       |
| Residual Std. Error       | 4.391 (df = 19166)          | 4.480 (df = 21310)          |
| F Statistic               | 76.304*** (df = 222; 19166) | 68.990*** (df = 223; 21310) |

*Note:* \*p<0.1; \*\*p<0.05; \*\*\*p<0.01

# Anticipation Effect

Table 4: Anticipation Effect (H1)

|                                  | <i>Dependent variable:</i> |                      |                      |
|----------------------------------|----------------------------|----------------------|----------------------|
|                                  | (lag2)                     | (lag4)               | (lag8)               |
| EP in PTA                        | 0.014<br>(0.138)           | 0.540***<br>(0.130)  | 4.439***<br>(0.249)  |
| Pollution Levels                 | -0.542***<br>(0.017)       | -0.536***<br>(0.017) | -0.532***<br>(0.017) |
| Economic Depth of PTA            | 0.079<br>(0.051)           | -0.122**<br>(0.051)  | -2.144***<br>(0.124) |
| Residual of 1st stage            | 0.151<br>(0.110)           | -0.293***<br>(0.105) | -3.604***<br>(0.209) |
| EP in PTA:Pollution Levels       | -0.105***<br>(0.011)       | -0.103***<br>(0.010) | -0.080***<br>(0.008) |
| Constant                         | 1.062**<br>(0.522)         | 1.019*<br>(0.522)    | 0.842<br>(0.520)     |
| Year-fixed effects?              | Yes                        | Yes                  | Yes                  |
| Country-fixed effects?           | Yes                        | Yes                  | Yes                  |
| Observations                     | 39,591                     | 39,591               | 39,591               |
| R <sup>2</sup>                   | 0.302                      | 0.302                | 0.307                |
| Adjusted R <sup>2</sup>          | 0.298                      | 0.298                | 0.303                |
| Residual Std. Error (df = 39371) | 4.349                      | 4.348                | 4.333                |
| F Statistic (df = 219; 39371)    | 77.638***                  | 77.771***            | 79.569***            |

*Note:* \*p<0.1; \*\*p<0.05; \*\*\*p<0.01

Table 5: Anticipation Effect (H2)

|                           | <i>Dependent variable:</i> |                      |                      |                      |                      |                      |
|---------------------------|----------------------------|----------------------|----------------------|----------------------|----------------------|----------------------|
|                           | low-wage<br>(lag2)         | high-wage<br>(lag2)  | low-wage<br>(lag4)   | high-wage<br>(lag4)  | low-wage<br>(lag8)   | high-wage<br>(lag8)  |
| Labor Rights in PTA       | 0.528*<br>(0.302)          | -1.152***<br>(0.269) | 1.071***<br>(0.241)  | -0.547**<br>(0.214)  | 3.895***<br>(0.293)  | 1.982***<br>(0.274)  |
| Labor Endowment           | 7.633***<br>(0.401)        | 16.087***<br>(0.438) | 7.679***<br>(0.402)  | 16.076***<br>(0.439) | 7.913***<br>(0.407)  | 15.976***<br>(0.444) |
| Economic Depth of PTA     | -0.002<br>(0.196)          | 0.216<br>(0.174)     | -0.409***<br>(0.156) | -0.147<br>(0.139)    | -2.609***<br>(0.211) | -1.921***<br>(0.196) |
| Residual of 1st stage     | 0.018<br>(0.064)           | 0.059<br>(0.058)     | -0.147**<br>(0.070)  | -0.092<br>(0.064)    | -1.549***<br>(0.124) | -1.197***<br>(0.120) |
| Labor Rights:Labor Endow. | -1.746***<br>(0.292)       | 3.190***<br>(0.311)  | -1.612***<br>(0.270) | 2.918***<br>(0.285)  | -0.672***<br>(0.228) | 2.798***<br>(0.242)  |
| Constant                  | -2.779***<br>(0.706)       | -4.758***<br>(0.636) | -2.797***<br>(0.706) | -4.749***<br>(0.636) | -3.007***<br>(0.704) | -4.833***<br>(0.635) |
| Year-fixed effects?       | Yes                        | Yes                  | Yes                  | Yes                  | Yes                  | Yes                  |
| Country-fixed effects?    | Yes                        | Yes                  | Yes                  | Yes                  | Yes                  | Yes                  |
| Observations              | 18,953                     | 21,625               | 18,953               | 21,625               | 18,953               | 21,625               |
| R <sup>2</sup>            | 0.346                      | 0.328                | 0.346                | 0.328                | 0.351                | 0.331                |
| Adjusted R <sup>2</sup>   | 0.338                      | 0.321                | 0.339                | 0.321                | 0.344                | 0.324                |
| Residual Std. Error       | 4.243 (df = 18739)         | 4.067 (df = 21411)   | 4.242 (df = 18739)   | 4.067 (df = 21411)   | 4.226 (df = 18739)   | 4.058 (df = 21411)   |

*Note:* \*p<0.1; \*\*p<0.05; \*\*\*p<0.01

# Robustness Checks

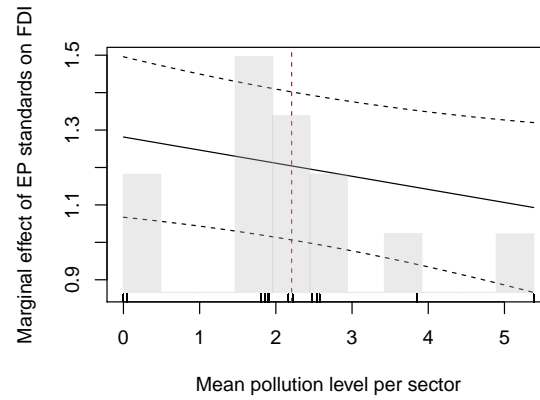

Figure 1: Placebo Test (H1)

Table 6: Placebo Test (H1)

|                            | <i>Dependent variable:</i>     |
|----------------------------|--------------------------------|
| EP in PTA                  | 1.281***<br>(0.109)            |
| Pollution Levels           | -0.582***<br>(0.018)           |
| Economic Depth of PTA      | -0.923***<br>(0.083)           |
| Residual of 1st stage      | -2.089***<br>(0.110)           |
| EP in PTA:Pollution Levels | -0.035*<br>(0.018)             |
| Constant                   | 0.402<br>(0.562)               |
| Year-fixed effects?        | Yes                            |
| Country-fixed effects?     | Yes                            |
| Observations               | 37,940                         |
| R <sup>2</sup>             | 0.359                          |
| Adjusted R <sup>2</sup>    | 0.355                          |
| Residual Std. Error        | 4.675 (df = 37717)             |
| F Statistic                | 95.024*** (df = 222; 37717)    |
| <i>Note:</i>               | * p<0.1; ** p<0.05; *** p<0.01 |

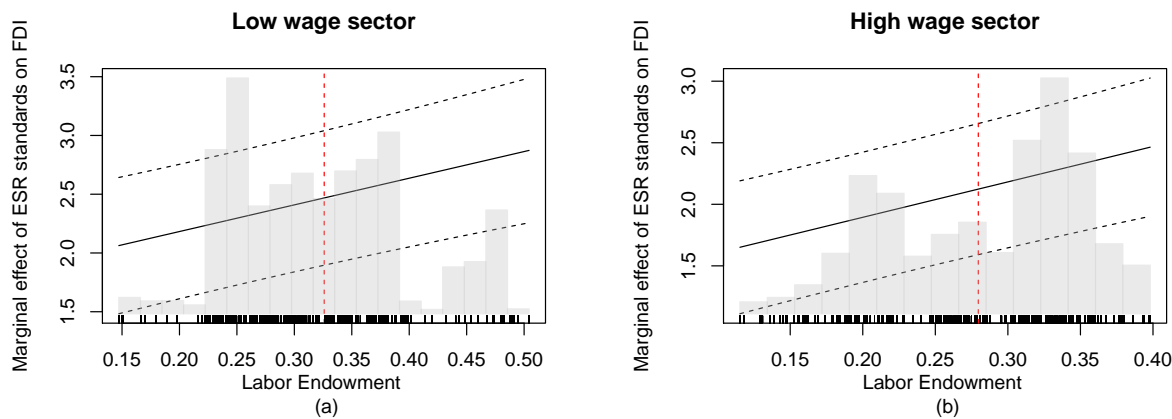

Figure 2: Placebo Test (H2)

Table 7: Placebo Test (H2)

|                           | <i>Dependent variable:</i>  |                             |
|---------------------------|-----------------------------|-----------------------------|
|                           | FDI (low-wage)<br>(1)       | FDI (high-wage)<br>(2)      |
| Labor Rights in PTA       | 1.729***<br>(0.318)         | 1.319***<br>(0.294)         |
| Labor Endowment           | 8.789***<br>(0.430)         | 19.478***<br>(0.499)        |
| Economic Depth of PTA     | -2.157***<br>(0.251)        | -1.811***<br>(0.235)        |
| Residual of 1st stage     | -4.267***<br>(0.330)        | -3.627***<br>(0.310)        |
| Labor Rights:Labor Endow. | 2.268***<br>(0.496)         | 2.876***<br>(0.539)         |
| Constant                  | -3.608***<br>(0.706)        | -6.060***<br>(0.754)        |
| Year-fixed effects?       | Yes                         | Yes                         |
| Country-fixed effects?    | Yes                         | Yes                         |
| Observations              | 18,393                      | 20,415                      |
| R <sup>2</sup>            | 0.424                       | 0.374                       |
| Adjusted R <sup>2</sup>   | 0.417                       | 0.368                       |
| Residual Std. Error       | 4.492 (df = 18177)          | 4.546 (df = 20199)          |
| F Statistic               | 62.207*** (df = 215; 18177) | 56.175*** (df = 215; 20199) |

Note:

\* p<0.1; \*\* p<0.05; \*\*\* p<0.01

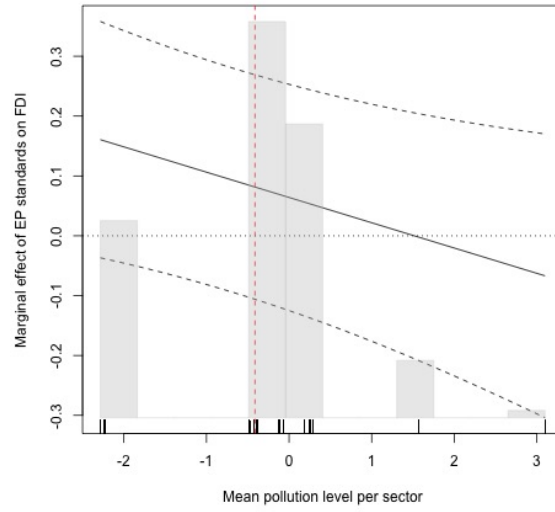

Figure 3: Lagged Dependent Variable (H1)

Table 8: Lagged Dependent Variable (H1)

|                            | <i>Dependent variable:</i>  |
|----------------------------|-----------------------------|
| EP in PTA                  | 0.064<br>(0.096)            |
| Pollution Levels           | -0.434***<br>(0.036)        |
| Economic Depth of PTA      | -0.014<br>(0.079)           |
| Lagged DV                  | 0.360***<br>(0.010)         |
| EP in PTA:Pollution Levels | -0.042**<br>(0.020)         |
| Constant                   | 3.543***<br>(0.843)         |
| Year-fixed effects?        | Yes                         |
| Country-fixed effects?     | Yes                         |
| Observations               | 14,376                      |
| R <sup>2</sup>             | 0.363                       |
| Adjusted R <sup>2</sup>    | 0.355                       |
| Residual Std. Error        | 4.414 (df = 14203)          |
| F Statistic                | 47.038*** (df = 172; 14203) |

*Note:* \* p<0.1; \*\* p<0.05; \*\*\* p<0.01

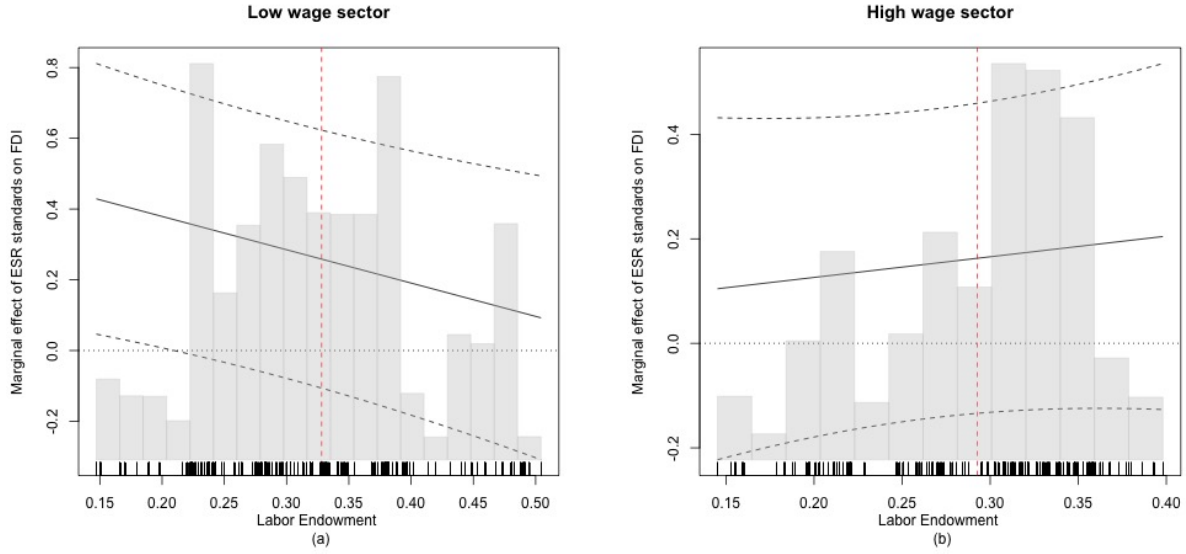

Figure 4: Lagged Dependent Variable (H2)

Table 9: Lagged Dependent Variable (H2)

|                           | <i>Dependent variable:</i> |                            |
|---------------------------|----------------------------|----------------------------|
|                           | FDI (low-wage)<br>(1)      | FDI (high-wage)<br>(2)     |
| Labor Rights in PTA       | 0.567**<br>(0.222)         | 0.047<br>(0.218)           |
| Labor Endowment           | 7.124***<br>(0.643)        | 22.167***<br>(0.967)       |
| Economic Depth of PTA     | -0.113<br>(0.127)          | -0.113<br>(0.103)          |
| Lagged DV                 | 0.266***<br>(0.016)        | 0.350***<br>(0.013)        |
| Labor Rights:Labor Endow. | -0.942**<br>(0.412)        | 0.395<br>(0.586)           |
| Constant                  | 0.539<br>(1.146)           | -4.254***<br>(1.162)       |
| Year-fixed effects?       | Yes                        | Yes                        |
| Country-fixed effects?    | Yes                        | Yes                        |
| Observations              | 7,980                      | 7,363                      |
| R <sup>2</sup>            | 0.335                      | 0.436                      |
| Adjusted R <sup>2</sup>   | 0.321                      | 0.422                      |
| Residual Std. Error       | 4.532 (df = 7808)          | 4.150 (df = 7191)          |
| F Statistic               | 23.012*** (df = 171; 7808) | 32.483*** (df = 171; 7191) |

*Note:* \* p<0.1; \*\* p<0.05; \*\*\* p<0.01

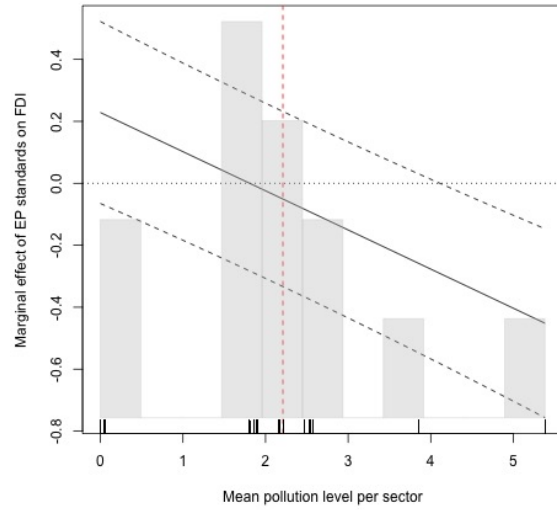

Figure 5: Subsample: Only Countries Signing a PTA with US (H1)

Table 10: Subsample: Only Countries Signing a PTA with US (H1)

|                            | <i>Dependent variable:</i>     |
|----------------------------|--------------------------------|
| EP in PTA                  | 0.229<br>(0.150)               |
| Pollution Levels           | -0.787***<br>(0.065)           |
| Economic Depth of PTA      | 0.029<br>(0.119)               |
| Residual of 1st stage      | -0.021<br>(0.080)              |
| EP in PTA:Pollution Levels | -0.126***<br>(0.018)           |
| Constant                   | 11.441***<br>(0.521)           |
| Year-fixed effects?        | Yes                            |
| Country-fixed effects?     | Yes                            |
| Observations               | 5,746                          |
| R <sup>2</sup>             | 0.255                          |
| Adjusted R <sup>2</sup>    | 0.249                          |
| Residual Std. Error        | 5.563 (df = 5695)              |
| F Statistic                | 39.037*** (df = 50; 5695)      |
| <i>Note:</i>               | * p<0.1; ** p<0.05; *** p<0.01 |

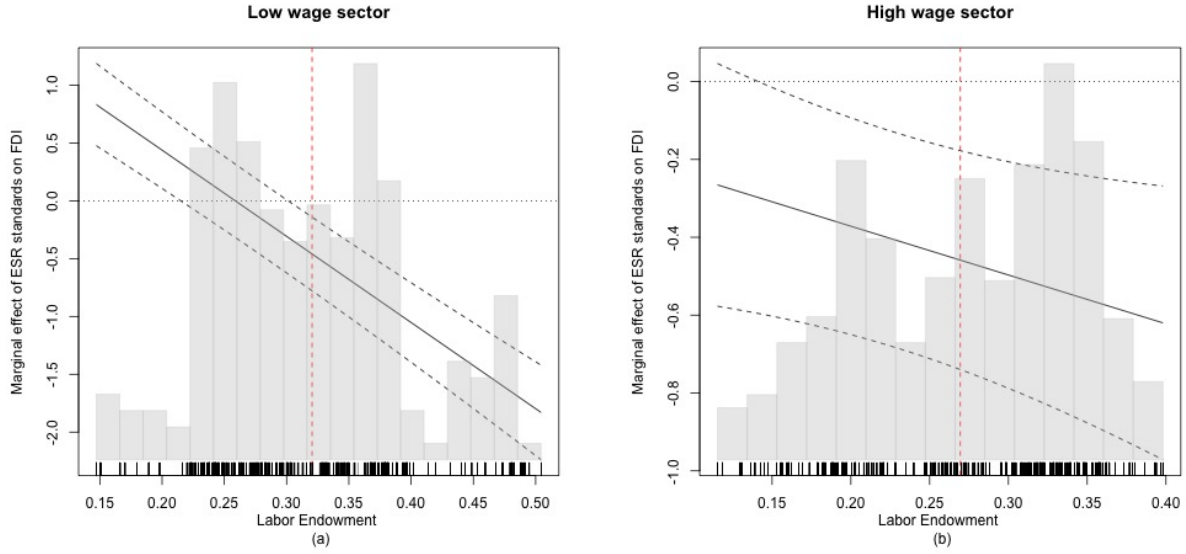

Figure 6: Subsample: Only Countries Signing a PTA with US (H2)

Table 11: Subsample: Only Countries Signing a PTA with US (H2)

|                           | <i>Dependent variable:</i> |                           |
|---------------------------|----------------------------|---------------------------|
|                           | FDI (low-wage)<br>(1)      | FDI (high-wage)<br>(2)    |
| Labor Rights in PTA       | 1.928***<br>(0.236)        | -0.121<br>(0.205)         |
| Labor Endowment           | 12.499***<br>(1.710)       | 28.435***<br>(1.751)      |
| Economic Depth of PTA     | -0.051<br>(0.103)          | 0.154*<br>(0.091)         |
| Residual of 1st stage     | 4.291***<br>(0.334)        | 3.776***<br>(0.302)       |
| Labor Rights:Labor Endow. | -7.452***<br>(0.605)       | -1.254*<br>(0.654)        |
| Constant                  | 6.954***<br>(0.892)        | -0.010<br>(0.820)         |
| Year-fixed effects?       | Yes                        | Yes                       |
| Country-fixed effects?    | Yes                        | Yes                       |
| Observations              | 2,576                      | 2,884                     |
| R <sup>2</sup>            | 0.277                      | 0.416                     |
| Adjusted R <sup>2</sup>   | 0.265                      | 0.407                     |
| Residual Std. Error       | 5.461 (df = 2531)          | 5.104 (df = 2839)         |
| F Statistic               | 22.063*** (df = 44; 2531)  | 45.958*** (df = 44; 2839) |

*Note:* \*p<0.1; \*\*p<0.05; \*\*\*p<0.01



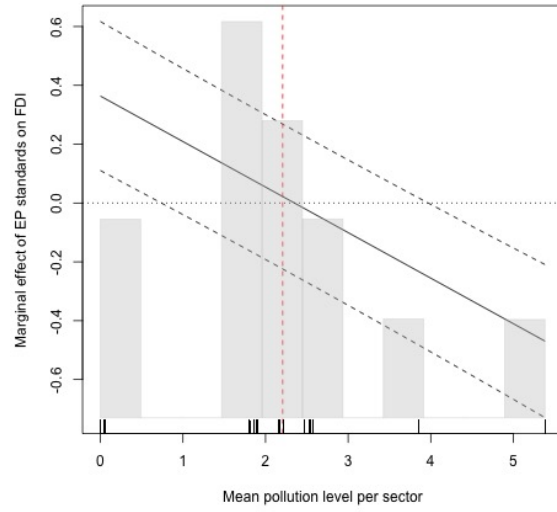

Figure 7: Pooling-OLS Model(H1)

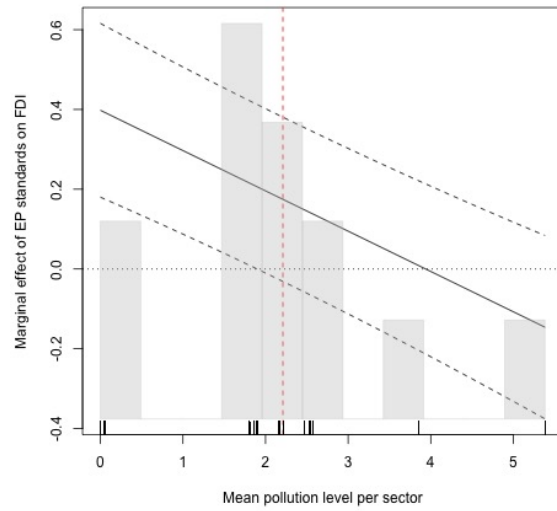

Figure 8: Random Effects Model (H1)

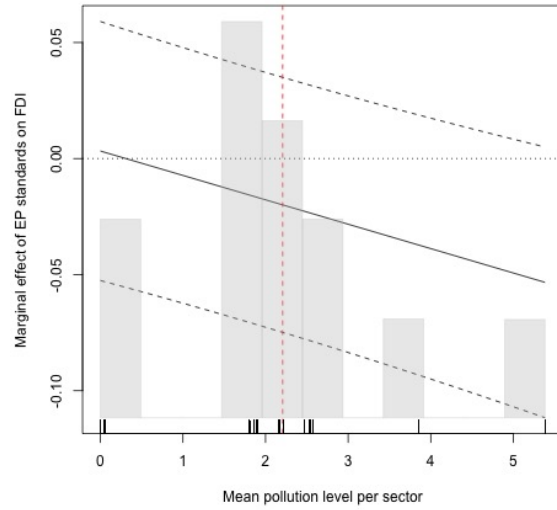

Figure 9: Poisson Maximum Likelihood (H1)

Table 12: Alternative Estimation Strategies (H1)

|                            | Dependent variable:          |                                         |                                                     |
|----------------------------|------------------------------|-----------------------------------------|-----------------------------------------------------|
|                            | (pooling)<br>(1)             | panel<br>linear<br>(random eff.)<br>(2) | glm: quasipoisson<br>link = log<br>(poisson)<br>(3) |
| EP in PTA                  | 0.364***<br>(0.129)          | 0.398***<br>(0.111)                     | 0.003<br>(0.028)                                    |
| Pollution Levels           | -0.598***<br>(0.018)         | -0.834***<br>(0.208)                    | -0.150***<br>(0.005)                                |
| Economic Depth of PTA      | -0.014<br>(0.102)            | -0.157*<br>(0.087)                      | 0.011<br>(0.023)                                    |
| Residual of 1st stage      | -0.033<br>(0.047)            | -0.145**<br>(0.059)                     | 0.001<br>(0.012)                                    |
| GDP                        |                              | 1.817***<br>(0.214)                     |                                                     |
| POP                        |                              | -0.758**<br>(0.342)                     |                                                     |
| Geographic Distance        |                              | -0.305<br>(0.341)                       |                                                     |
| EP in PTA:Pollution Levels | -0.155***<br>(0.014)         | -0.101***<br>(0.016)                    | -0.011***<br>(0.003)                                |
| Constant                   | 0.698<br>(0.570)             | -21.338***<br>(5.261)                   | -1.513**<br>(0.663)                                 |
| Year-fixed effects?        | Yes                          | Yes                                     |                                                     |
| Country-fixed effects?     | Yes                          | Yes                                     |                                                     |
| Observations               | 39,955                       | 5,746                                   | 39,955                                              |
| R <sup>2</sup>             | 0.359                        | 0.038                                   |                                                     |
| Adjusted R <sup>2</sup>    | 0.356                        | 0.032                                   |                                                     |
| F Statistic                | 100.276*** (df = 222; 39732) | 5.568*** (df = 41; 5704)                |                                                     |

Note:

\*p<0.1; \*\*p<0.05; \*\*\*p<0.01

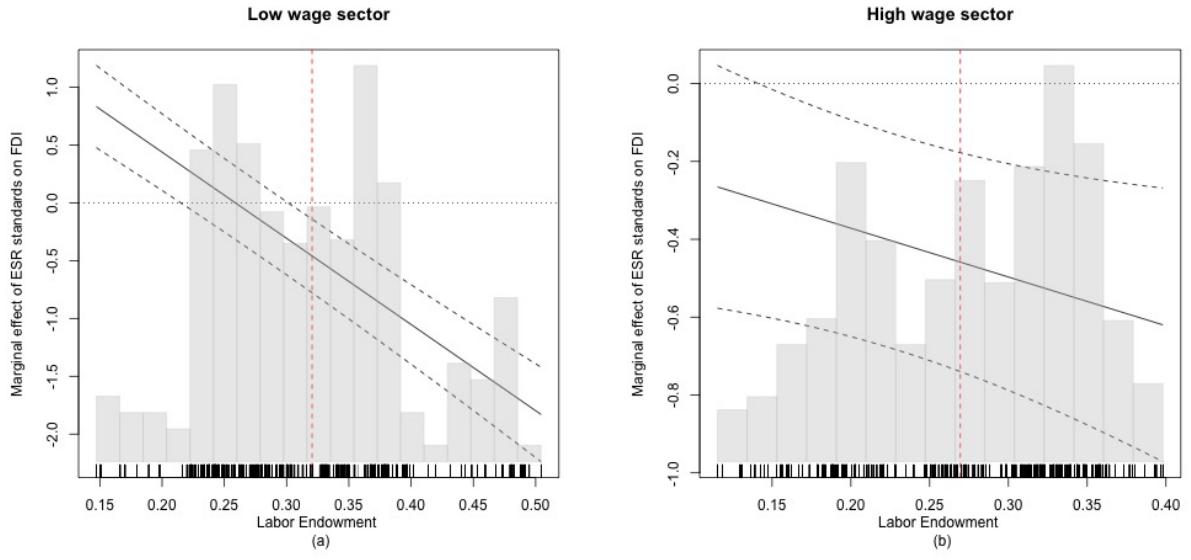

Figure 10: Pooled-OLS model (H2)

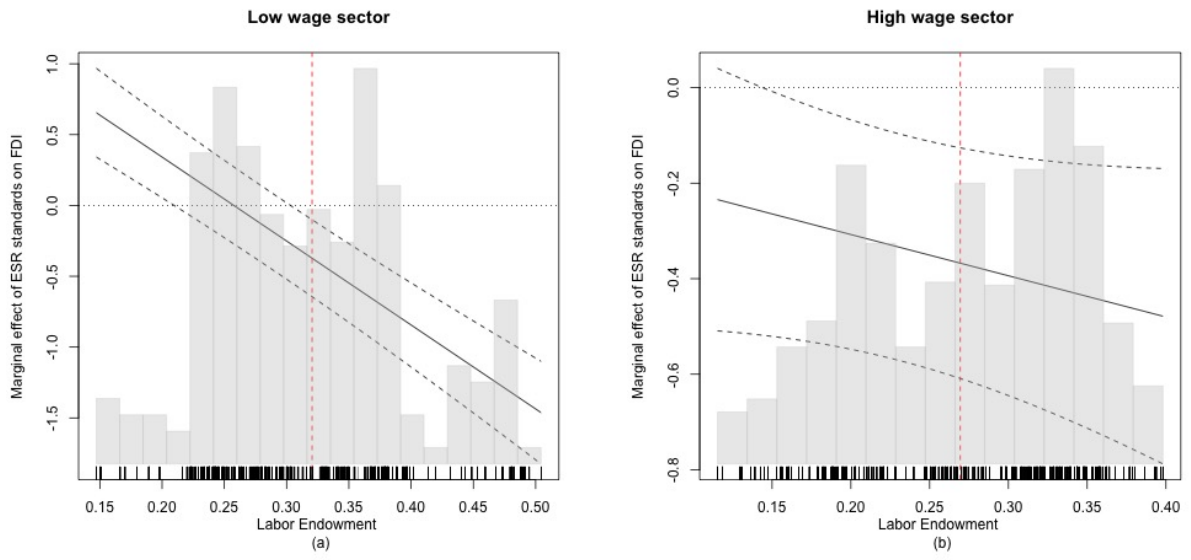

Figure 11: Random Effect Model (H2)

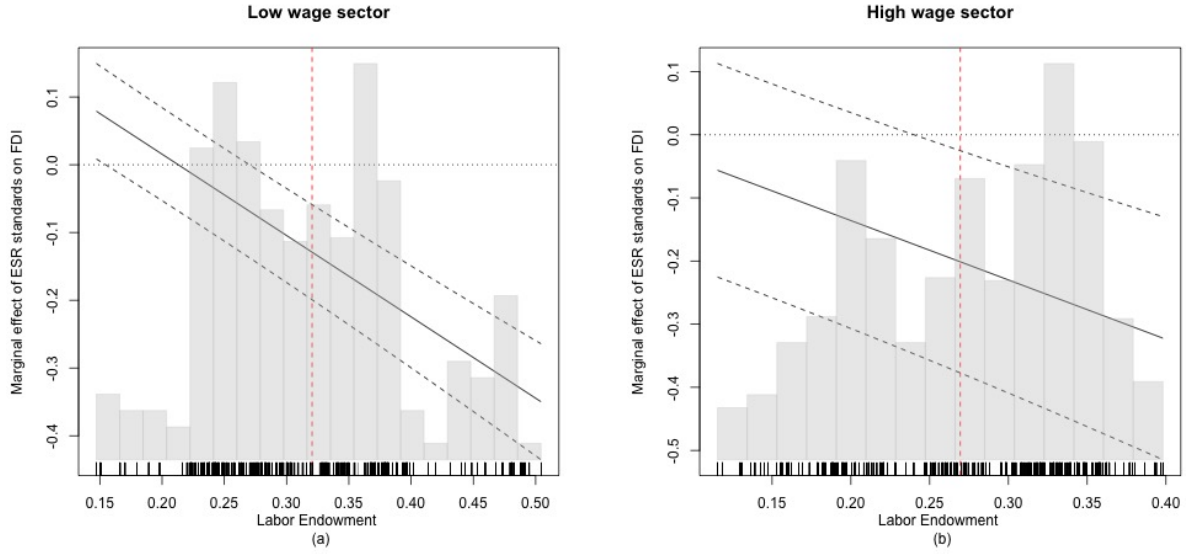

Figure 12: Poisson Maximum Likelihood (H2)

Table 13: Alternative Estimation Strategies (H2)

|                           | <i>Dependent variable:</i> |                            |                               |                                |                                     |                            |
|---------------------------|----------------------------|----------------------------|-------------------------------|--------------------------------|-------------------------------------|----------------------------|
|                           |                            |                            | <i>panel linear</i>           |                                | <i>glm: quasipoisson link = log</i> |                            |
|                           | <i>low-wage (pooling)</i>  | <i>high-wage (pooling)</i> | <i>low-wage (random eff.)</i> | <i>high-wage (random eff.)</i> | <i>low-wage (poisson)</i>           | <i>high-wage (poisson)</i> |
|                           | (1)                        | (2)                        | (3)                           | (4)                            | (5)                                 | (6)                        |
| Labor Rights in PTA       | 1.928***<br>(0.236)        | -0.121<br>(0.205)          | 1.482***<br>(0.210)           | -0.218<br>(0.181)              | 0.256***<br>(0.042)                 | 0.052<br>(0.089)           |
| Labor Endowment           | 12.499***<br>(1.710)       | 28.435***<br>(1.751)       | 21.437***<br>(3.285)          | 5.805*<br>(3.290)              | 1.750***<br>(0.262)                 | 6.852***<br>(0.489)        |
| Economic Depth of PTA     | -0.051<br>(0.103)          | 0.154*<br>(0.091)          | -0.0001<br>(0.085)            | 0.201***<br>(0.075)            | 0.015<br>(0.022)                    | 0.094*<br>(0.056)          |
| Residual of 1st stage     | 4.291***<br>(0.334)        | 3.776***<br>(0.302)        | 3.583***<br>(0.274)           | 2.845***<br>(0.248)            | 0.789***<br>(0.067)                 | 0.738***<br>(0.090)        |
| GDP                       |                            |                            | 2.522***<br>(0.308)           | 2.404***<br>(0.268)            |                                     |                            |
| POP                       |                            |                            | -1.624***<br>(0.462)          | -1.439***<br>(0.398)           |                                     |                            |
| Geographic Distance       |                            |                            | -0.370<br>(0.422)             | 0.129<br>(0.366)               |                                     |                            |
| Labor Rights:Labor Endow. | -7.452***<br>(0.605)       | -1.254*<br>(0.654)         | -6.037***<br>(0.565)          | -0.918<br>(0.598)              | -1.201***<br>(0.098)                | -0.940***<br>(0.171)       |
| Constant                  | 6.954***<br>(0.892)        | -0.010<br>(0.820)          | -31.115***<br>(6.536)         | -32.285***<br>(5.688)          | 1.804***<br>(0.135)                 | -0.120<br>(0.214)          |
| Year-fixed effects?       | Yes                        | Yes                        | Yes                           | Yes                            | Yes                                 | Yes                        |
| Country-fixed effects?    | Yes                        | Yes                        | Yes                           | Yes                            | Yes                                 | Yes                        |
| Observations              | 2,576                      | 2,884                      | 2,576                         | 2,884                          | 2,576                               | 2,884                      |
| R <sup>2</sup>            | 0.277                      | 0.416                      | 0.111                         | 0.119                          |                                     |                            |
| Adjusted R <sup>2</sup>   | 0.265                      | 0.407                      | 0.099                         | 0.108                          |                                     |                            |

Note:

\* p<0.1; \*\* p<0.05; \*\*\* p<0.01

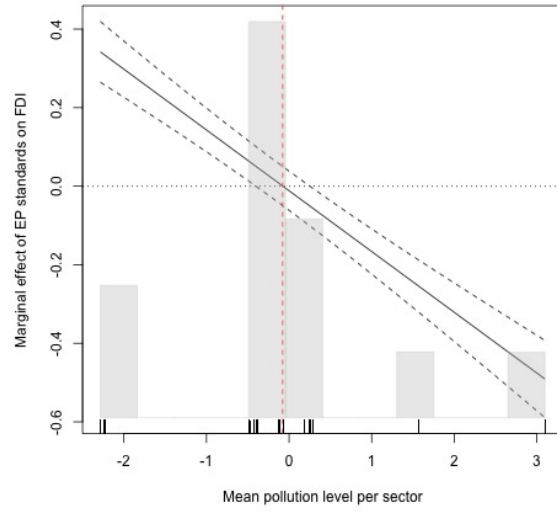

Figure 13: Reduced Model (H1)

Table 14: Reduced Model(H1)

|                            | <i>Dependent variable:</i>   |
|----------------------------|------------------------------|
| EP in PTA                  | -0.012<br>(0.025)            |
| Pollution Levels           | -0.598***<br>(0.018)         |
| EP in PTA:Pollution Levels | -0.155***<br>(0.014)         |
| Constant                   | -0.666<br>(0.569)            |
| Year-fixed effects?        | Yes                          |
| Country-fixed effects?     | Yes                          |
| Observations               | 39,955                       |
| R <sup>2</sup>             | 0.359                        |
| Adjusted R <sup>2</sup>    | 0.356                        |
| Residual Std. Error        | 4.755 (df = 39734)           |
| F Statistic                | 101.184*** (df = 220; 39734) |
| <i>Note:</i>               | *p<0.1; **p<0.05; ***p<0.01  |

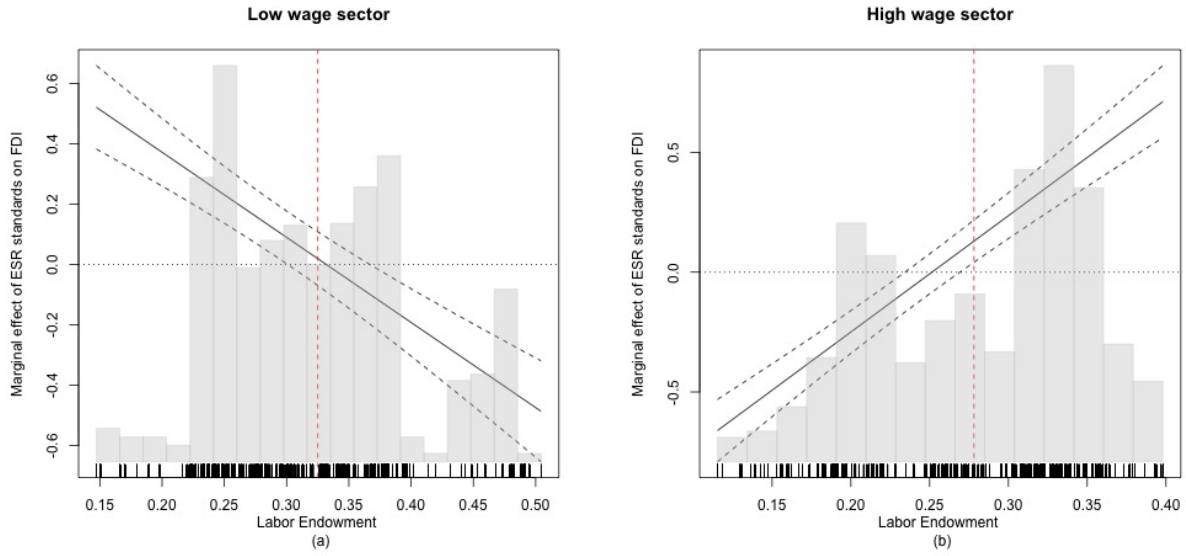

Figure 14: Reduced Model (H2)

Table 15: Reduced Model (H2)

|                           | <i>Dependent variable:</i>  |                             |
|---------------------------|-----------------------------|-----------------------------|
|                           | FDI (low-wage)<br>(1)       | FDI (high-wage)<br>(2)      |
| Labor Rights in PTA       | 0.936***<br>(0.116)         | -1.221**<br>(0.107)         |
| Labor Endowment           | 9.138***<br>(0.429)         | 20.281***<br>(0.493)        |
| Labor Rights:Labor Endow. | -2.822***<br>(0.357)        | 4.856***<br>(0.407)         |
| Constant                  | -3.636***<br>(0.720)        | -6.220***<br>(0.762)        |
| Year-fixed effects?       | Yes                         | Yes                         |
| Country-fixed effects?    | Yes                         | Yes                         |
| Observations              | 19,389                      | 21,534                      |
| R <sup>2</sup>            | 0.419                       | 0.385                       |
| Adjusted R <sup>2</sup>   | 0.413                       | 0.379                       |
| Residual Std. Error       | 4.592 (df = 19174)          | 4.609 (df = 21319)          |
| F Statistic               | 64.653*** (df = 214; 19174) | 62.426*** (df = 214; 21319) |

Note:

\* p<0.1; \*\* p<0.05; \*\*\* p<0.01

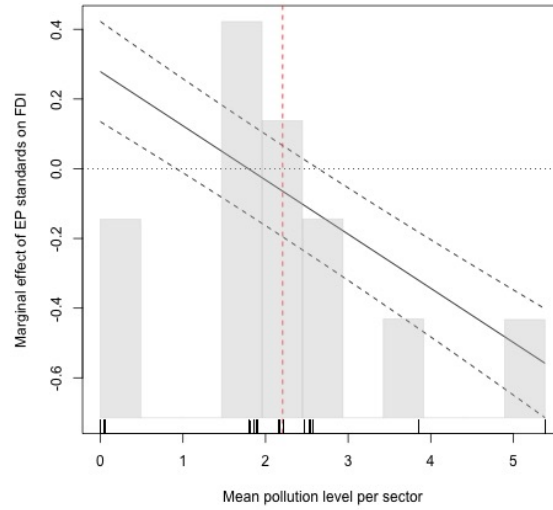

Figure 15: Expanded Model (H1)

Table 16: Expanded Model (H1)

|                            | <i>Dependent variable:</i>  |
|----------------------------|-----------------------------|
| EP in PTA                  | 0.279***<br>(0.073)         |
| Pollution Levels           | -0.597***<br>(0.019)        |
| Economic Depth of PTA      | 0.028<br>(0.054)            |
| Residual of 1st stage      | 13.508**<br>(6.421)         |
| BIT                        | -0.280<br>(0.175)           |
| GDP                        | 0.883***<br>(0.105)         |
| Population                 | -1.058***<br>(0.281)        |
| Geographic Distance        | 0.000<br>(1.457)            |
| EP in PTA:Pollution Levels | -0.155***<br>(0.014)        |
| Constant                   | -1.901<br>(13.798)          |
| <hr/>                      |                             |
| Year-fixed effects?        | Yes                         |
| Country-fixed effects?     | Yes                         |
| Observations               | 38,694                      |
| R <sup>2</sup>             | 0.359                       |
| Adjusted R <sup>2</sup>    | 0.356                       |
| Residual Std. Error        | 4.771 (df = 38477)          |
| F Statistic                | 99.850*** (df = 216; 38477) |
| <hr/>                      |                             |
| <i>Note:</i>               | *p<0.1; **p<0.05; ***p<0.01 |

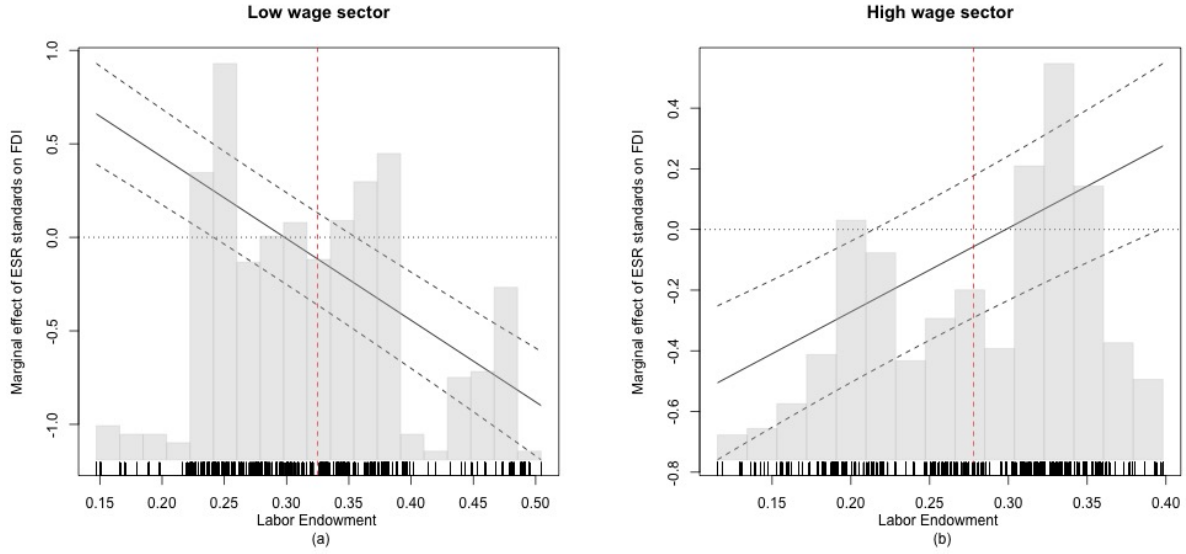

Figure 16: Expanded Model (H2)

Table 17: Expanded Model (H2)

|                           | <i>Dependent variable:</i>  |                             |
|---------------------------|-----------------------------|-----------------------------|
|                           | FDI (low-wage)<br>(1)       | FDI (high-wage)<br>(2)      |
| Labor Rights in PTA       | 1.303***<br>(0.168)         | -0.824***<br>(0.158)        |
| Labor Endowment           | 9.012***<br>(0.436)         | 20.116***<br>(0.501)        |
| Economic Depth of PTA     | -0.147*<br>(0.087)          | -0.009<br>(0.081)           |
| Residual of 1st stage     | 2.015***<br>(0.162)         | 1.773***<br>(0.156)         |
| BIT                       | -0.253<br>(0.251)           | -0.567**<br>(0.240)         |
| GDP                       | 0.984***<br>(0.157)         | 0.609***<br>(0.150)         |
| Population                | -1.886***<br>(0.473)        | -2.739***<br>(0.448)        |
| Geographic Distance       | -0.000<br>(1.909)           | -0.000<br>(1.795)           |
| Labor Rights:Labor Endow. | -4.366***<br>(0.379)        | 2.762***<br>(0.447)         |
| Constant                  | 3.770<br>(18.507)           | 21.782<br>(17.422)          |
| Year-fixed effects?       | Yes                         | Yes                         |
| Country-fixed effects?    | Yes                         | Yes                         |
| Observations              | 18,787                      | 20,846                      |
| R <sup>2</sup>            | 0.423                       | 0.389                       |
| Adjusted R <sup>2</sup>   | 0.417                       | 0.383                       |
| Residual Std. Error       | 4.588 (df = 18576)          | 4.612 (df = 20635)          |
| F Statistic               | 64.963*** (df = 210; 18576) | 62.571*** (df = 210; 20635) |

Note: \*p<0.1; \*\*p<0.05; \*\*\*p<0.01



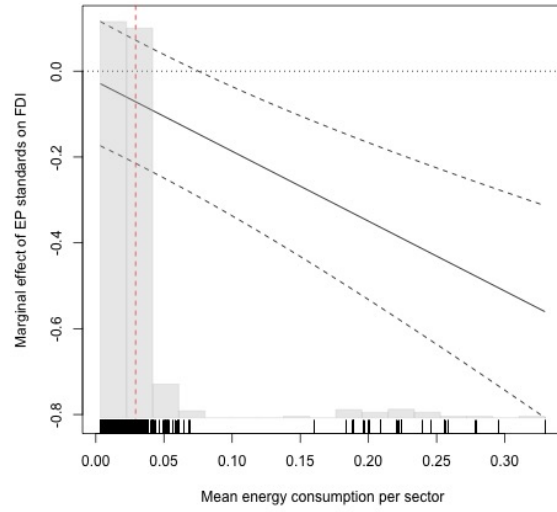

Figure 17: Time-Variant Interaction (H1)

Table 18: Energy Consumption instead of Polluting Levels (H1)

|                              | <i>Dependent variable:</i>     |
|------------------------------|--------------------------------|
| EP in PTA                    | -0.024<br>(0.074)              |
| Energy Consumption           | -26.112***<br>(0.661)          |
| Economic Depth of PTA        | 0.029<br>(0.060)               |
| EP in PTA:Energy Consumption | -1.629***<br>(0.346)           |
| Constant                     | 1.407**<br>(0.597)             |
| Year-fixed effects?          | Yes                            |
| Country-fixed effects?       | Yes                            |
| Observations                 | 35,513                         |
| R <sup>2</sup>               | 0.409                          |
| Adjusted R <sup>2</sup>      | 0.406                          |
| Residual Std. Error          | 4.849 (df = 35297)             |
| F Statistic                  | 113.746*** (df = 215; 35297)   |
| <i>Note:</i>                 | * p<0.1; ** p<0.05; *** p<0.01 |

---

## Sector Names Matching

---



Sector-Names' Matching Table

| Product-Line Name                                                                | Name used in Analysis | BEA-Industry Name                                    | 4-Digit Industry Code | World Bank Industry Code |
|----------------------------------------------------------------------------------|-----------------------|------------------------------------------------------|-----------------------|--------------------------|
| Other electrical equipment and components                                        | Electric equipment    | Electric and electronic equipment                    | 3300                  | 3350                     |
| Insurance carriers and related activities                                        | Finance non-bank      | Finance, except depository institutions              | 5500                  | 5530                     |
| Insurance carriers, except life insurance carriers                               | Finance non-bank      | Finance, except depository institutions              | 5500                  | 5530                     |
| Life insurance carriers                                                          | Finance non-bank      | Finance, except depository institutions              | 5500                  | 5530                     |
| Agencies, brokerages, and other insurance related activities                     | Finance non-bank      | Finance, except depository institutions              | 5500                  | 5530                     |
| Finance, except depository institutions                                          | Finance non-bank      | Finance except depository institutions and insurance | 5200                  | 5230                     |
| Securities, commodity contracts, and other intermediation and related activities | Finance non-bank      | Finance except depository institutions and insurance | 5200                  | 5230                     |
| Securities and commodity contracts intermediation and brokerage                  | Finance non-bank      | Finance except depository institutions and insurance | 5200                  | 5230                     |
| Other financial investment activities and exchanges                              | Finance non-bank      | Finance except depository institutions and insurance | 5200                  | 5230                     |
| Nondepository credit intermediation and related services                         | Finance non-bank      | Finance except depository institutions and insurance | 5200                  | 5220                     |
| Nondepository credit intermediation                                              | Finance non-bank      | Finance except depository institutions and insurance | 5200                  | 5220                     |
| Activities related to credit intermediation                                      | Finance non-bank      | Finance except depository institutions and insurance | 5200                  | 5220                     |
| Funds, trusts, and other financial vehicles                                      | Finance non-bank      | Finance except depository institutions and insurance | 5200                  | 5250                     |
| Crop production                                                                  | Agriculture           | Food                                                 | 1100                  | 1110                     |
| Forestry and logging                                                             | Agriculture           | Food                                                 | 1100                  | 1130                     |
| Fishing, hunting, and trapping                                                   | Agriculture           | Food                                                 | 1100                  | 1140                     |
| Agriculture, forestry, fishing, and hunting                                      | Agriculture           | Food                                                 | 1100                  | 1100                     |
| Animal production                                                                | Agriculture           | Food                                                 | 1100                  | 1120                     |
| Support activities for agriculture and forestry                                  | Agriculture           | Food                                                 | 1100                  | 1150                     |
| Animal slaughtering and processing                                               | Food                  | Food and kindred products                            | 3100                  | 3110                     |
| Dairy products                                                                   | Food                  | Food and kindred products                            | 3100                  | 3110                     |

Sector-Names' Matching Table

| Product-Line Name                                      | Name used in Analysis | BEA-Industry Name         | 4-Digit Industry Code | World Bank Industry Code |
|--------------------------------------------------------|-----------------------|---------------------------|-----------------------|--------------------------|
| Food                                                   | Food                  | Food and kindred products | 3100                  |                          |
| Animal foods                                           | Food                  | Food and kindred products | 3100                  | 3111                     |
| Grain and oilseed milling                              | Food                  | Food and kindred products | 3100                  | 3112                     |
| Sugar and confectionery products                       | Food                  | Food and kindred products | 3100                  | 3113                     |
| Fruit and vegetable preserving and specialty foods     | Food                  | Food and kindred products | 3100                  | 3114                     |
| Seafood product preparation and packaging              | Food                  | Food and kindred products | 3100                  | 3117                     |
| Bakeries and tortillas                                 | Food                  | Food and kindred products | 3100                  | 3118                     |
| Other food products                                    | Food                  | Food and kindred products | 3100                  | 3119                     |
| Beverages and tobacco products                         | Food                  | Food and kindred products | 3100                  | 3120                     |
| Beverages                                              | Food                  | Food and kindred products | 3100                  | 3121                     |
| Management of nonbank companies and enterprises        | Holding               | Holding companies nonbank | 5500                  | 5510                     |
| Holding companies, except bank holding companies       | Holding               | Holding companies nonbank | 5500                  | 5512                     |
| Corporate, subsidiary, and regional management offices | Holding               | Holding companies nonbank | 5500                  | 5513                     |
| Information                                            | Information           | Information               | 5100                  |                          |
| Publishing industries                                  | Information           | Information               | 5100                  | NH                       |
| Newspaper, periodical, book, and database publishers   | Information           | Information               | 5100                  | NH                       |
| Software publishers                                    | Information           | Information               | 5100                  | NH                       |
| Motion picture and sound recording industries          | Information           | Information               | 5100                  | NH                       |
| Motion picture and video industries                    | Information           | Information               | 5100                  | NH                       |
| Sound recording industries                             | Information           | Information               | 5100                  | NH                       |
| Broadcasting (except Internet) and telecommunications  | Information           | Information               | 5100                  | NH                       |
| Broadcasting (except Internet)                         | Information           | Information               | 5100                  | NH                       |
| Radio and television broadcasting                      | Information           | Information               | 5100                  | NH                       |
| Cable and other subscription programming               | Information           | Information               | 5100                  | NH                       |
| Telecommunications                                     | Information           | Information               | 5100                  | NH                       |
| Wired telecommunications carriers                      | Information           | Information               | 5100                  | NH                       |

Sector-Names' Matching Table

| Product-Line Name                                                              | Name used in Analysis | BEA-Industry Name           | 4-Digit Industry Code | World Bank Industry Code |
|--------------------------------------------------------------------------------|-----------------------|-----------------------------|-----------------------|--------------------------|
| Wireless telecommunications carriers (except satellite)                        | Information           | Information                 | 5100                  | 5172                     |
| Satellite telecommunications                                                   | Information           | Information                 | 5100                  | 5170                     |
| Other telecommunications                                                       | Information           | Information                 | 5100                  | 5170                     |
| Data processing, hosting, and related services                                 | Information           | Information                 | 5100                  | 5180                     |
| Other information services                                                     | Information           | Information                 | 5100                  | 5191                     |
| Machinery                                                                      | Machinery             | Machinery except electrical | 3300                  | 3330                     |
| Agriculture, construction, and mining machinery                                | Machinery             | Machinery except electrical | 3300                  | 3331                     |
| Industrial machinery                                                           | Machinery             | Machinery except electrical | 3300                  | 3332                     |
| Other                                                                          | Machinery             | Machinery except electrical | 3300                  | 3330                     |
| Commercial and service industry machinery                                      | Machinery             | Machinery except electrical | 3300                  | 3333                     |
| Ventilation, heating, air-conditioning, and commercial refrigeration equipment | Machinery             | Machinery except electrical | 3300                  | 3334                     |
| Metalworking machinery                                                         | Machinery             | Machinery except electrical | 3300                  | 3335                     |
| Engines, turbines, and power transmission equipment                            | Machinery             | Machinery except electrical | 3300                  | 3336                     |
| Other general purpose machinery                                                | Machinery             | Machinery except electrical | 3300                  | 3339                     |
| Other                                                                          | Mining                | Mining                      | 2100                  | BA                       |
| Iron ores                                                                      | Mining                | Mining                      | 2100                  | BC                       |
| Mining                                                                         | Mining                | Mining                      | 2100                  | IA                       |
| Coal mining                                                                    | Mining                | Mining                      | 2100                  |                          |
| Nonmetallic mineral mining and quarrying                                       | Mining                | Mining                      | 2100                  |                          |
| Metal ore mining                                                               | Mining                | Mining                      | 2100                  |                          |
| Gold and silver ores                                                           | Mining                | Mining                      | 2100                  |                          |
| Copper, nickel, lead, and zinc ores                                            | Mining                | Mining                      | 2100                  |                          |
| Other metal ores                                                               | Mining                | Mining                      | 2100                  |                          |
| Support activities for mining                                                  | Mining                | Mining                      | 2100                  |                          |
| Support activities for oil and gas extraction                                  | Mining                | Mining                      | 2100                  |                          |
| Support activities for mining, except for oil and gas extraction               | Mining                | Mining                      | 2100                  |                          |
| Textile product mills                                                          | Other manufacturing   | Other manufacturing         | 3000                  | 3140                     |
|                                                                                |                       |                             | 3100                  | 3140                     |
|                                                                                |                       |                             | 3100                  | DA                       |

Sector-Names' Matching Table

| Product-Line Name                                            | Name used in Analysis | BEA-Industry Name             | 4-Digit Industry Code | World Bank Industry Code |
|--------------------------------------------------------------|-----------------------|-------------------------------|-----------------------|--------------------------|
| Apparel                                                      | Other manufacturing   | Other manufacturing           | 3100                  | 3150                     |
| Leather and allied products                                  | Other manufacturing   | Other manufacturing           | 3100                  | 3160                     |
| Miscellaneous manufacturing                                  | Other manufacturing   | Other manufacturing           | 3300                  | 3390                     |
| Medical equipment and supplies                               | Other manufacturing   | Other manufacturing           | 3300                  | 3391                     |
| Other miscellaneous manufacturing                            | Other manufacturing   | Other manufacturing           | 3300                  | 3399                     |
| Manufacturing                                                | Other manufacturing   | 3000                          |                       |                          |
| Textiles, apparel, and leather products                      | Other manufacturing   | Other manufacturing           | 3100                  |                          |
| Textile mills                                                | Other manufacturing   | Other manufacturing           | 3100                  | 3130                     |
| Wood products                                                | Other manufacturing   | Other manufacturing           | 3200                  | 3210                     |
| Paper                                                        | Other manufacturing   | Other manufacturing           | 3200                  | 3220                     |
| Pulp, paper, and paperboard mills                            | Other manufacturing   | Other manufacturing           | 3200                  | 3221                     |
| Converted paper products                                     | Other manufacturing   | Other manufacturing           | 3200                  | 3222                     |
| Plastics and rubber products                                 | Other manufacturing   | Other manufacturing           | 3200                  | 3260                     |
| Plastics products                                            | Other manufacturing   | Other manufacturing           | 3200                  | 3261                     |
| Rubber products                                              | Other manufacturing   | Other manufacturing           | 3200                  | 3262                     |
| Oil and gas extraction                                       | Petroleum             | Petroleum                     | 2111                  | BB                       |
| Petroleum refining excluding oil and gas extraction          | Petroleum             | Petroleum                     | 3200                  | 3243                     |
| Petroleum and coal products                                  | Petroleum             | Petroleum                     | 3200                  | 3240                     |
| Integrated petroleum refining and extraction                 | Petroleum             | Petroleum                     | 3200                  | 3242                     |
| Asphalt and other petroleum and coal products                | Petroleum             | Petroleum                     | 3200                  | 3244                     |
| Petroleum tanker operations                                  | Petroleum             | Petroleum                     | 4800                  | 4833                     |
| Primary and fabricated metals                                | Metal                 | Primary and fabricated metals | 3300                  |                          |
| Primary metals                                               | Metal                 | Primary and fabricated metals | 3300                  | 3310                     |
| Iron and steel mills and ferroalloys                         | Metal                 | Primary and fabricated metals | 3300                  | 3311                     |
| Steel products from purchased steel                          | Metal                 | Primary and fabricated metals | 3300                  | 3312                     |
| Alumina and aluminum production and processing               | Metal                 | Primary and fabricated metals | 3300                  | 3313                     |
| Nonferrous metal (except aluminum) production and processing | Metal                 | Primary and fabricated metals | 3300                  | 3314                     |
| Foundries                                                    | Metal                 | Primary and fabricated metals | 3300                  | 3315                     |

Sector-Names' Matching Table

| Product-Line Name                                              | Name used in Analysis | BEA-Industry Name                              | 4-Digit Industry Code | World Bank Industry Code |
|----------------------------------------------------------------|-----------------------|------------------------------------------------|-----------------------|--------------------------|
| Fabricated metal products                                      | Metal                 | Primary and fabricated metals                  | 3300                  | 3320                     |
| Forging and stamping                                           | Metal                 | Primary and fabricated metals                  | 3300                  | 3320                     |
| Cutlery and handtools                                          | Metal                 | Primary and fabricated metals                  | 3300                  | 3320                     |
| Architectural and structural metals                            | Metal                 | Primary and fabricated metals                  | 3300                  | 3320                     |
| Boilers, tanks, and shipping containers                        | Metal                 | Primary and fabricated metals                  | 3300                  | 3320                     |
| Hardware                                                       | Metal                 | Primary and fabricated metals                  | 3300                  | 3320                     |
| Spring and wire products                                       | Metal                 | Primary and fabricated metals                  | 3300                  | 3320                     |
| Machine shops, turned products, and screws, nuts, and bolts    | Metal                 | Primary and fabricated metals                  | 3300                  | 3320                     |
| Coating, engraving, heat treating, and allied activities       | Metal                 | Primary and fabricated metals                  | 3300                  | 3320                     |
| Other fabricated metal products                                | Metal                 | Primary and fabricated metals                  | 3300                  | 3320                     |
| Professional, scientific, and technical services               | Technical service     | Professional scientific and technical services | 5400                  | 5410                     |
| Architectural, engineering, and related services               | Technical service     | Professional scientific and technical services | 5400                  | 5410                     |
| Computer systems design and related services                   | Technical service     | Professional scientific and technical services | 5400                  | 5410                     |
| Management, scientific, and technical consulting               | Technical service     | Professional scientific and technical services | 5400                  | 5410                     |
| Advertising and related services                               | Technical service     | Professional scientific and technical services | 5400                  | 5410                     |
| Other                                                          | Technical service     | Professional scientific and technical services | 5400                  | 5410                     |
| Legal services                                                 | Technical service     | Professional scientific and technical services | 5400                  | 5410                     |
| Accounting, tax preparation, bookkeeping, and payroll services | Technical service     | Professional scientific and technical services | 5400                  | 5410                     |
| Specialized design services                                    | Technical service     | Professional scientific and technical services | 5400                  | 5410                     |
| Scientific research and development services                   | Technical service     | Professional scientific and technical services | 5400                  | 5410                     |
| Other professional, scientific, and technical services         | Technical service     | Professional scientific and technical services | 5400                  | 5410                     |
| Office administrative services                                 | Service               | Services                                       | 5600                  | 5610                     |
| Personal and laundry services                                  | Service               | Services                                       | 8100                  | 8120                     |



Sector-Names' Matching Table

| Product-Line Name                                         | Name used in Analysis | BEA-Industry Name | 4-Digit Industry Code | World Bank Industry Code |
|-----------------------------------------------------------|-----------------------|-------------------|-----------------------|--------------------------|
| Repair and maintenance                                    | Service               | Services          | 8100                  | 8110                     |
| Other rental and leasing services                         | Service               | Services          | 5000                  | 5320                     |
| Administrative and support services                       | Service               | Services          | 5000                  | 5610                     |
| Facilities support services                               | Service               | Services          | 5000                  | 5612                     |
| Employment services                                       | Service               | Services          | 5000                  | 5613                     |
| Business support services                                 | Service               | Services          | 5000                  | 5614                     |
| Travel arrangement and reservation services               | Service               | Services          | 5000                  | 5615                     |
| Investigation and security services                       | Service               | Services          | 5000                  | 5616                     |
| Services to buildings and dwellings                       | Service               | Services          | 5000                  | 5617                     |
| Other support services                                    | Service               | Services          | 5000                  | 5619                     |
| Waste management and remediation services                 | Service               | Services          | 5000                  | 5620                     |
| Health care and social assistance                         | Service               | Services          | 6000                  | 6200                     |
| Ambulatory health care services                           | Service               | Services          | 6000                  | 6200                     |
| Hospitals                                                 | Service               | Services          | 6000                  | 6220                     |
| Nursing and residential care facilities                   | Service               | Services          | 6000                  | 6230                     |
| Social assistance                                         | Service               | Services          | 6000                  | 6240                     |
| Accommodation and food services                           | Service               | Services          | 7000                  | 7200                     |
| Accommodation                                             | Service               | Services          | 7000                  | 7210                     |
| Food services and drinking places                         | Service               | Services          | 7000                  | 7220                     |
| Miscellaneous services                                    | Service               | Services          | 6000                  | 6100                     |
| Educational services                                      | Service               | Services          | 6000                  | 6110                     |
| Arts, entertainment, and recreation                       | Service               | Services          | 7000                  | 7100                     |
| Performing arts, spectator sports, and related industries | Service               | Services          | 7000                  | 7110                     |
| Museums, historical sites, and similar institutions       | Service               | Services          | 7000                  | 7120                     |
| Amusement, gambling, and recreation industries            | Service               | Services          | 7000                  | 7130                     |
|                                                           |                       |                   |                       | PF                       |
|                                                           |                       |                   |                       | 5329                     |
|                                                           |                       |                   |                       | 5612                     |
|                                                           |                       |                   |                       | 5613                     |
|                                                           |                       |                   |                       | 5614                     |
|                                                           |                       |                   |                       | 5615                     |
|                                                           |                       |                   |                       | 5616                     |
|                                                           |                       |                   |                       | 5617                     |
|                                                           |                       |                   |                       | 5619                     |
|                                                           |                       |                   |                       | 5620                     |
|                                                           |                       |                   |                       | 6200                     |
|                                                           |                       |                   |                       | 6200                     |
|                                                           |                       |                   |                       | 6220                     |
|                                                           |                       |                   |                       | 6230                     |
|                                                           |                       |                   |                       | 6240                     |
|                                                           |                       |                   |                       | 7200                     |
|                                                           |                       |                   |                       | 7210                     |
|                                                           |                       |                   |                       | 7220                     |
|                                                           |                       |                   |                       | 6100                     |
|                                                           |                       |                   |                       | 6110                     |
|                                                           |                       |                   |                       | 7100                     |
|                                                           |                       |                   |                       | 7110                     |
|                                                           |                       |                   |                       | 7120                     |
|                                                           |                       |                   |                       | 7121                     |
|                                                           |                       |                   |                       | 7130                     |

Sector-Names' Matching Table

| Product-Line Name                                                    | Name used in Analysis | BEA-Industry Name        | 4-Digit Industry Code | World Bank Industry Code |
|----------------------------------------------------------------------|-----------------------|--------------------------|-----------------------|--------------------------|
| Other services (except public administration and private households) | Service               | Services                 | 8100                  |                          |
| Nonbusiness entities, except government                              | Service               | Services                 | 8100                  |                          |
| Printing and related support activities                              | Service               | Services                 | 3200                  | 3231                     |
| Ship and boat building                                               | Transport equipment   | Transportation equipment | 3300                  | 3366                     |
| Rail transportation                                                  | Transport equipment   | Transportation equipment | 4800                  | 4821                     |
| Transit and ground passenger transportation                          | Transport equipment   | Transportation equipment | 4800                  | 4850                     |
| Water transportation                                                 | Transport equipment   | Transportation equipment | 4800                  | 4830                     |
| Air transportation                                                   | Transport equipment   | Transportation equipment | 4800                  | 4810                     |
| Transportation equipment                                             | Transport equipment   | Transportation equipment | 3300                  | 3360                     |
| Motor vehicles, bodies and trailers, and parts                       | Transport equipment   | Transportation equipment | 3300                  | 3360                     |
| Motor vehicles                                                       | Transport equipment   | Transportation equipment | 3300                  | 3361                     |
| Motor vehicle bodies and trailers                                    | Transport equipment   | Transportation equipment | 3300                  | 3362                     |
| Motor vehicle parts                                                  | Transport equipment   | Transportation equipment | 3300                  | 3363                     |
| Other                                                                | Transport equipment   | Transportation equipment | 3300                  | 3360                     |
| Aerospace products and parts                                         | Transport equipment   | Transportation equipment | 3300                  | 3364                     |
| Railroad rolling stock                                               | Transport equipment   | Transportation equipment | 3300                  | 3365                     |
| Other transportation equipment                                       | Transport equipment   | Transportation equipment | 3300                  | 3369                     |
| Electric power generation, transmission, and distribution            | Utilities             | Utilities                | 2000                  | 2211                     |
| Utilities                                                            | Utilities             | Utilities                | 2000                  | 2210                     |
| Natural gas distribution                                             | Utilities             | Utilities                | 2000                  | 2210                     |
| Water, sewage, and other systems                                     | Utilities             | Utilities                | 2000                  | 2210                     |
| Beer, wine, and distilled alcoholic beverages                        | Wholesale trade       | Wholesale trade          | 4200                  | 4248                     |
| Miscellaneous nondurable goods                                       | Wholesale trade       | Wholesale trade          | 4200                  | 4249                     |
| Wholesale trade                                                      | Wholesale trade       | Wholesale trade          | 4000                  | 4234                     |
| Professional and commercial equipment and supplies                   | Wholesale trade       | Wholesale trade          | 4200                  | 4247                     |
| Petroleum and petroleum products                                     | Wholesale trade       | Wholesale trade          | 4000                  | 4240                     |
| Drugs and druggists' sundries                                        | Wholesale trade       | Wholesale trade          | 4000                  | 4242                     |
| Other                                                                | Wholesale trade       | Wholesale trade          | 4000                  | 4230                     |

Sector-Names' Matching Table

| Product-Line Name                                         | Name used in Analysis | BEA-Industry Name   | 4-Digit Industry Code | World Bank Industry Code |
|-----------------------------------------------------------|-----------------------|---------------------|-----------------------|--------------------------|
| Motor vehicles and motor vehicle parts and supplies       | Wholesale trade       | Wholesale trade     | 4200                  | 4230                     |
| Furniture and home furnishings                            | Wholesale trade       | Wholesale trade     | 4200                  | 4230                     |
| Lumber and other construction materials                   | Wholesale trade       | Wholesale trade     | 4200                  | 4230                     |
| Metals and minerals (except petroleum)                    | Wholesale trade       | Wholesale trade     | 4200                  | 4230                     |
| Electrical goods                                          | Wholesale trade       | Wholesale trade     | 4200                  | 4230                     |
| Hardware, and plumbing and heating equipment and supplies | Wholesale trade       | Wholesale trade     | 4200                  | 4230                     |
| Machinery, equipment, and supplies                        | Wholesale trade       | Wholesale trade     | 4200                  | 4230                     |
| Miscellaneous durable goods                               | Wholesale trade       | Wholesale trade     | 4200                  | 4230                     |
| Paper and paper products                                  | Wholesale trade       | Wholesale trade     | 4200                  | 4240                     |
| Apparel, piece goods, and notions                         | Wholesale trade       | Wholesale trade     | 4200                  | 4240                     |
| Grocery and related products                              | Wholesale trade       | Wholesale trade     | 4200                  | 4240                     |
| Farm product raw materials                                | Wholesale trade       | Wholesale trade     | 4200                  | 4240                     |
| Chemical and allied products                              | Wholesale trade       | Wholesale trade     | 4200                  | 4240                     |
| Wholesale electronic markets and agents and brokers       | Wholesale trade       | Wholesale trade     | 4200                  | 4250                     |
| Construction                                              | not covered by BEA    |                     | 2300                  |                          |
| Construction of buildings                                 | not covered by BEA    |                     | 2300                  |                          |
| Heavy and civil engineering construction                  | not covered by BEA    |                     | 2300                  |                          |
| Special trade contractors                                 | not covered by BEA    |                     | 2300                  |                          |
| Food and beverage stores                                  | not covered by BEA    |                     | 4400                  |                          |
| Tobacco products                                          | Other manufacturing   | Other manufacturing | 3100                  |                          |
| Nonmetallic mineral products                              | Other manufacturing   | Other manufacturing | 3000                  |                          |
| Clay products and refractories                            | Other manufacturing   | Other manufacturing | 3200                  |                          |
| Glass and glass products                                  | Other manufacturing   | Other manufacturing | 3200                  |                          |
| Cement and concrete products                              | Other manufacturing   | Other manufacturing | 3200                  |                          |
| Lime and gypsum products                                  | Other manufacturing   | Other manufacturing | 3200                  |                          |
| Other nonmetallic mineral products                        | Other manufacturing   | Other manufacturing | 3200                  |                          |
| Furniture and related products                            | Other manufacturing   | Other manufacturing | 3300                  |                          |
| Retail trade                                              | not covered by BEA    |                     | 4500                  |                          |
| General merchandise stores                                | not covered by BEA    |                     | 4500                  |                          |

Sector-Names' Matching Table

| Product-Line Name                                                                 | Name used in Analysis | BEA-Industry Name | 4-Digit Industry Code | World Bank Industry Code |
|-----------------------------------------------------------------------------------|-----------------------|-------------------|-----------------------|--------------------------|
| Clothing and clothing accessories stores                                          | not covered by BEA    | 4000              | 4400                  | 4480                     |
| Other                                                                             | not covered by BEA    | 4000              | 4400                  |                          |
| Motor vehicle and parts dealers                                                   | not covered by BEA    | 4000              | 4410                  |                          |
| Furniture and home furnishings stores                                             | not covered by BEA    | 4000              | 4420                  |                          |
| Electronics and appliance stores                                                  | not covered by BEA    | 4000              | 4430                  | 4431                     |
| Building material and garden equipment and supplies dealers                       | not covered by BEA    | 4000              | 4440                  |                          |
| Health and personal care stores                                                   | not covered by BEA    | 4000              | 4460                  | 4461                     |
| Gasoline stations                                                                 | not covered by BEA    | 4000              | 4470                  | 4471                     |
| Sporting goods, hobby, book, and music stores                                     | not covered by BEA    | 4000              | 4500                  | 4510                     |
| Miscellaneous store retailers                                                     | not covered by BEA    | 4000              | 4500                  | 4530                     |
| Nonstore retailers                                                                | not covered by BEA    | 4000              | 4500                  | 4540                     |
| Finance and insurance                                                             | not covered by BEA    | 5000              |                       |                          |
| Other industries                                                                  | not covered by BEA    | 1000              |                       |                          |
| Transportation and warehousing                                                    | not covered by BEA    | 4000              | 4800                  |                          |
| Other water transportation                                                        | not covered by BEA    | 4000              | 4800                  | 4830                     |
| Truck transportation                                                              | not covered by BEA    | 4000              | 4800                  | 4840                     |
| Pipeline transportation                                                           | not covered by BEA    | 4000              | 4800                  | 4860                     |
| Pipeline transportation of crude oil, refined petroleum products, and natural gas | not covered by BEA    | 4000              | 4800                  | 4863                     |
| Other pipeline transportation                                                     | not covered by BEA    | 4000              | 4800                  | 4868                     |
| Scenic and sightseeing transportation                                             | not covered by BEA    | 4000              | 4800                  | 4870                     |
| Support activities for transportation                                             | not covered by BEA    | 4000              | 4800                  | 4880                     |
| Couriers and messengers                                                           | not covered by BEA    | 4000              | 4900                  | 4920                     |
| Warehousing and storage facilities                                                | not covered by BEA    | 4000              | 4900                  | 4930                     |
| Petroleum storage for hire                                                        | not covered by BEA    | 4000              | 4900                  | 4932                     |
| Other warehousing and storage                                                     | not covered by BEA    | 4000              | 4900                  | 4939                     |
| Real estate and rental and leasing                                                | not covered by BEA    | 5000              | 5300                  |                          |
| Real estate                                                                       | not covered by BEA    | 5000              | 5300                  | 5310                     |
| Rental and leasing (except real estate)                                           | not covered by BEA    | 5000              | 5300                  | 5320                     |

Sector-Names' Matching Table

| Product-Line Name                                                    | Name used in Analysis | BEA-Industry Name                                    | 4-Digit Industry Code | World Bank Industry Code |
|----------------------------------------------------------------------|-----------------------|------------------------------------------------------|-----------------------|--------------------------|
| Automotive equipment rental and leasing                              | not covered by BEA    |                                                      | 5300                  | 5320                     |
| Lessors of nonfinancial intangible assets (except copyrighted works) | not covered by BEA    |                                                      | 5300                  | 5330                     |
| Administration, support, and waste management                        | not covered by BEA    |                                                      | 5600                  |                          |
| Depository credit intermediation (banking)                           | Banking               | Depository institutions                              | 5200                  | 5220                     |
| Banks                                                                | Banking               | Depository institutions                              | 5200                  | 5220                     |
| Branches and agencies                                                | Banking               | Depository institutions                              | 5200                  | 5220                     |
| Chemicals                                                            | Chemicals             | Chemicals                                            | 3200                  | 3250                     |
| Basic chemicals                                                      | Chemicals             | Chemicals                                            | 3200                  | 3250                     |
| Resins and synthetic rubber, fibers, and filaments                   | Chemicals             | Chemicals                                            | 3200                  | 3250                     |
| Pharmaceuticals and medicines                                        | Chemicals             | Chemicals                                            | 3200                  | 3250                     |
| Soap, cleaning compounds, and toilet preparations                    | Chemicals             | Chemicals                                            | 3200                  | 3250                     |
| Other                                                                | Chemicals             | Chemicals                                            | 3200                  | 3250                     |
| Pesticides, fertilizers, and other agricultural chemicals            | Chemicals             | Chemicals                                            | 3200                  | 3250                     |
| Paints, coatings, and adhesives                                      | Chemicals             | Chemicals                                            | 3200                  | 3250                     |
| Other chemical products and preparations                             | Chemicals             | Chemicals                                            | 3200                  | 3250                     |
| Electric lighting equipment                                          | Electric equipment    | Electrical equipment and components                  | 3300                  | 3350                     |
| Electrical equipment, appliances, and components                     | Electric equipment    | Electrical equipment and components                  | 3300                  | 3350                     |
| Household appliances                                                 | Electric equipment    | Electrical equipment and components                  | 3300                  | 3350                     |
| Electrical equipment                                                 | Electric equipment    | Electrical equipment and components                  | 3300                  | 3350                     |
| Other electrical equipment and components                            | Electric equipment    | Electrical equipment and components                  | 3300                  | 3350                     |
| Insurance carriers and related activities                            | Finance non-bank      | Finance except depository institutions and insurance | 5500                  | 5530                     |
| Insurance carriers, except life insurance carriers                   | Finance non-bank      | Finance except depository institutions and insurance | 5500                  | 5530                     |

Sector-Names' Matching Table

| Product-Line Name                                                              | Name used in Analysis | BEA-Industry Name                                    | 4-Digit Industry Code | World Bank Industry Code |
|--------------------------------------------------------------------------------|-----------------------|------------------------------------------------------|-----------------------|--------------------------|
| Life insurance carriers                                                        | Finance non-bank      | Finance except depository institutions and insurance | 5500                  | 5249                     |
| Agencies, brokerages, and other insurance related activities                   | Finance non-bank      | Finance except depository institutions and insurance | 5500                  | 5242                     |
| Finance, except depository institutions                                        | Finance non-bank      | Finance except depository institutions and insurance | 5200                  | 5230                     |
| Management of nonbank companies and enterprises                                | not covered by BEA    | 5000                                                 | 5510                  |                          |
| Holding companies, except bank holding companies                               | not covered by BEA    | 5000                                                 | 5510                  | 5512                     |
| Corporate, subsidiary, and regional management offices                         | not covered by BEA    | 5000                                                 | 5510                  | 5513                     |
| Machinery                                                                      | Machinery             | Machinery                                            | 3300                  | 3330                     |
| Agriculture, construction, and mining machinery                                | Machinery             | Machinery                                            | 3300                  | 3331                     |
| Industrial machinery                                                           | Machinery             | Machinery                                            | 3300                  | 3332                     |
| Other                                                                          | Machinery             | Machinery                                            | 3300                  | 3330                     |
| Commercial and service industry machinery                                      | Machinery             | Machinery                                            | 3300                  | 3333                     |
| Ventilation, heating, air-conditioning, and commercial refrigeration equipment | Machinery             | Machinery                                            | 3300                  | 3334                     |
| Metalworking machinery                                                         | Machinery             | Machinery                                            | 3300                  | 3335                     |
| Engines, turbines, and power transmission equipment                            | Machinery             | Machinery                                            | 3300                  | 3336                     |
| Other general purpose machinery                                                | Machinery             | Machinery                                            | 3300                  | 3339                     |
| Textile product mills                                                          | Other manufacturing   | Other manufacturing                                  | 3100                  | 3140                     |
| Apparel                                                                        | Other manufacturing   | Other manufacturing                                  | 3100                  | 3150                     |
| Leather and allied products                                                    | Other manufacturing   | Other manufacturing                                  | 3100                  | 3160                     |
| Miscellaneous manufacturing                                                    | Other manufacturing   | Other manufacturing                                  | 3300                  | 3390                     |
| Medical equipment and supplies                                                 | Other manufacturing   | Other manufacturing                                  | 3300                  | 3391                     |
| Other miscellaneous manufacturing                                              | Other manufacturing   | Other manufacturing                                  | 3300                  | 3399                     |
| Manufacturing                                                                  | Other manufacturing   | Other manufacturing                                  | 3000                  |                          |
| Textiles, apparel, and leather products                                        | Other manufacturing   | Other manufacturing                                  | 3100                  |                          |
| Textile mills                                                                  | Other manufacturing   | Other manufacturing                                  | 3100                  | 3130                     |
| Wood products                                                                  | Other manufacturing   | Other manufacturing                                  | 3200                  | 3210                     |

Sector-Names' Matching Table

| Product-Line Name                                              | Name used in Analysis | BEA-Industry Name   | 4-Digit Industry Code | World Bank Industry Code |
|----------------------------------------------------------------|-----------------------|---------------------|-----------------------|--------------------------|
| Paper                                                          | Other manufacturing   | Other manufacturing | 3200                  | 3220                     |
| Pulp, paper, and paperboard mills                              | Other manufacturing   | Other manufacturing | 3200                  | 3221                     |
| Converted paper products                                       | Other manufacturing   | Other manufacturing | 3200                  | 3222                     |
| Plastics and rubber products                                   | Other manufacturing   | Other manufacturing | 3200                  | 3260                     |
| Plastics products                                              | Other manufacturing   | Other manufacturing | 3200                  | 3261                     |
| Rubber products                                                | Other manufacturing   | Other manufacturing | 3200                  | 3262                     |
| Professional, scientific, and technical services               | Technical service     | Services            | 5400                  | 5410                     |
| Architectural, engineering, and related services               | Technical service     | Services            | 5400                  | 5413                     |
| Computer systems design and related services                   | Technical service     | Services            | 5400                  | 5415                     |
| Management, scientific, and technical consulting               | Technical service     | Services            | 5400                  | 5416                     |
| Advertising and related services                               | Technical service     | Services            | 5400                  | 5418                     |
| Other                                                          | Technical service     | Services            | 5400                  | 5410                     |
| Legal services                                                 | Technical service     | Services            | 5400                  | 5411                     |
| Accounting, tax preparation, bookkeeping, and payroll services | Technical service     | Services            | 5400                  | 5412                     |
| Specialized design services                                    | Technical service     | Services            | 5400                  | 5414                     |
| Scientific research and development services                   | Technical service     | Services            | 5400                  | 5417                     |
| Other professional, scientific, and technical services         | Technical service     | Services            | 5400                  | 5419                     |
| Ship and boat building                                         | Transport equipment   | Transport equipment | 3300                  | 3366                     |
| Rail transportation                                            | Transport equipment   | Transport equipment | 4800                  | 4821                     |
| Transit and ground passenger transportation                    | Transport equipment   | Transport equipment | 4800                  | 4850                     |
| Water transportation                                           | Transport equipment   | Transport equipment | 4800                  | 4830                     |
| Air transportation                                             | Transport equipment   | Transport equipment | 4800                  | 4810                     |
| Transportation equipment                                       | Transport equipment   | Transport equipment | 3300                  | 3360                     |
| Motor vehicles, bodies and trailers, and parts                 | Transport equipment   | Transport equipment | 3300                  | 3360                     |
| Motor vehicles                                                 | Transport equipment   | Transport equipment | 3300                  | 3361                     |
| Motor vehicle bodies and trailers                              | Transport equipment   | Transport equipment | 3300                  | 3362                     |
| Motor vehicle parts                                            | Transport equipment   | Transport equipment | 3300                  | 3363                     |
| Other                                                          | Transport equipment   | Transport equipment | 3300                  | 3360                     |
|                                                                |                       |                     |                       | JD                       |
|                                                                |                       |                     |                       | NB                       |
|                                                                |                       |                     |                       | ND                       |
|                                                                |                       |                     |                       | NF                       |

Sector-Names' Matching Table

| Product-Line Name                                         | Name used in Analysis | BEA-Industry Name   | 4-Digit Industry Code | World Bank Industry Code |
|-----------------------------------------------------------|-----------------------|---------------------|-----------------------|--------------------------|
| Aerospace products and parts                              | Transport equipment   | Transport equipment | 3300                  | 3364                     |
| Railroad rolling stock                                    | Transport equipment   | Transport equipment | 3300                  | 3365                     |
| Other transportation equipment                            | Transport equipment   | Transport equipment | 3300                  | 3369                     |
| Beer, wine, and distilled alcoholic beverages             | Wholesale trade       | Wholesale trade     | 4200                  | 4248 MA                  |
| Miscellaneous nondurable goods                            | Wholesale trade       | Wholesale trade     | 4200                  | 4249 MA                  |
| Wholesale trade                                           | Wholesale trade       | Wholesale trade     | 4000                  |                          |
| Professional and commercial equipment and supplies        | Wholesale trade       | Wholesale trade     | 4200                  | 4234                     |
| Petroleum and petroleum products                          | Wholesale trade       | Wholesale trade     | 4200                  | 4247                     |
| Drugs and druggists' sundries                             | Wholesale trade       | Wholesale trade     | 4200                  | 4242                     |
| Other                                                     | Wholesale trade       | Wholesale trade     | 4200                  | 4230                     |
| Motor vehicles and motor vehicle parts and supplies       | Wholesale trade       | Wholesale trade     | 4200                  | 4231                     |
| Furniture and home furnishings                            | Wholesale trade       | Wholesale trade     | 4200                  | 4232                     |
| Lumber and other construction materials                   | Wholesale trade       | Wholesale trade     | 4200                  | 4233                     |
| Metals and minerals (except petroleum)                    | Wholesale trade       | Wholesale trade     | 4200                  | 4235                     |
| Electrical goods                                          | Wholesale trade       | Wholesale trade     | 4200                  | 4236                     |
| Hardware, and plumbing and heating equipment and supplies | Wholesale trade       | Wholesale trade     | 4200                  | 4237                     |
| Machinery, equipment, and supplies                        | Wholesale trade       | Wholesale trade     | 4200                  | 4238                     |
| Miscellaneous durable goods                               | Wholesale trade       | Wholesale trade     | 4200                  | 4239                     |
| Paper and paper products                                  | Wholesale trade       | Wholesale trade     | 4200                  | 4241                     |
| Apparel, piece goods, and notions                         | Wholesale trade       | Wholesale trade     | 4200                  | 4243                     |
| Grocery and related products                              | Wholesale trade       | Wholesale trade     | 4200                  | 4244                     |
| Farm product raw materials                                | Wholesale trade       | Wholesale trade     | 4200                  | 4245                     |
| Chemical and allied products                              | Wholesale trade       | Wholesale trade     | 4200                  | 4246                     |
| Wholesale electronic markets and agents and brokers       | Wholesale trade       | Wholesale trade     | 4200                  | 4251                     |
| Tobacco products                                          | Other manufacturing   | Other manufacturing | 3100                  | 3122                     |
| Nonmetallic mineral products                              | Other manufacturing   | Other manufacturing | 3200                  | 3270                     |
| Clay products and refractories                            | Other manufacturing   | Other manufacturing | 3200                  | 3271                     |
| Glass and glass products                                  | Other manufacturing   | Other manufacturing | 3200                  | 3272                     |
| Cement and concrete products                              | Other manufacturing   | Other manufacturing | 3200                  | 3273                     |



Sector-Names' Matching Table

| Product-Line Name                  | Name used in Analysis | BEA-Industry Name | 4-Digit Industry Code | World Bank Industry Code |
|------------------------------------|-----------------------|-------------------|-----------------------|--------------------------|
| Lime and gypsum products           | Other manufacturing   | 3000              | 3200                  | 3274                     |
| Other nonmetallic mineral products | Other manufacturing   | 3000              | 3200                  | 3279                     |
| Furniture and related products     | Other manufacturing   | 3000              | 3300                  | 3370                     |

## References

- Kohl, T., Brakman, S., and Garretsen, H. (2016). Do Trade Agreements Stimulate International Trade Differently? Evidence from 296 Trade Agreements. *The World Economy*, 39(1):97–131. [3](#)
- Morin, J.-F., Dür, A., and Lechner, L. (2016). Mapping the Trade and Environment Nexus: Insights from a New Dataset. [3](#)
- Raess, D. and Sari, D. (2016). LABPTA: Labour Provisions in Trade Agreements. [3](#)
- Spilker, G. and Böhmelt, T. (2012). The impact of preferential trade agreements on governmental repression revisited. *The Review of International Organizations*, 8(3):343–361. [3](#)
